# Supplementary material for: New insights on human essential genes based on integrated analysis and the construction of the HEGIAP web-based platform
Source: PubMed Central journal article supplement — Brief Bioinform. 2019 Aug 15;21(4):1397–410. doi: 10.1093/bib/bbz072 (PMC7373178; doi:10.1093/bib/bbz072), 2019-08-15
Supplement: supplementary_material_bbz072.pdf [file supplementary_material_bbz072.pdf]

# Supplementary Materials for

## **New insights on human essential genes based on integrated analysis and the construction of the HEGIAP web-based platform**

Hebing Chen<sup>1,†</sup>, Zhuo Zhang<sup>1,†</sup>, Shuai Jiang<sup>1,†</sup>, Ruijiang Li<sup>1,†</sup>, Wanying Li<sup>1</sup>, Chenghui Zhao<sup>1</sup>, Hao Hong<sup>1</sup>, Xin Huang<sup>1</sup>, Hao Li<sup>1,\*</sup> and Xiaochen Bo<sup>1,\*</sup>

<sup>1</sup>Beijing Institute of Radiation Medicine, Beijing 100850, China.

\*To whom correspondence should be addressed: Tel: +8601066932251; Email: [lihao527\\_thu@foxmail.com](mailto:lihao527_thu@foxmail.com) (H.L.); [boxc@bmi.ac.cn](mailto:boxc@bmi.ac.cn) (X.B).

†These authors contributed equally to this work.

### **The PDF file includes:**

Fig. S1. Protein characteristics.

Fig. S2. Relationship between the degree of connectivity and the number of all genes.

Fig. S3. GO analysis of 10 groups of genes.

Fig. S4. Sequences characteristics.

Fig. S5. Structural characteristics.

Fig. S6. 3D structure.

Fig. S7. Distributions of transcription factor binding sites in regions 1-kb up- or downstream of gene body from five human cell lines.

Fig. S8. Epigenetic signals.

Fig. S9. Essentiality and conservation.

Fig. S10. Essential genes proportion for different cell lines.

Fig. S11. The difference between young essential genes (gene age group 12-13) and old essential genes.

Fig. S12. Comparison of homologous essential genes of different species.

Fig. S13. Protein localization analysis using experimental annotation and predicted data.

Fig. S14. Gene expression similarity during human and mouse embryonic development.

Fig. S15. Relationship between human essential genes and cancer.

Table. S1. Significantly differential expressed genes (DEGs) in cancer-normal tissue pairs.

Table. S2. Candidate drugs.

Table. S3. Data description.

Table. S4. CS threshold of each gene group.

**A**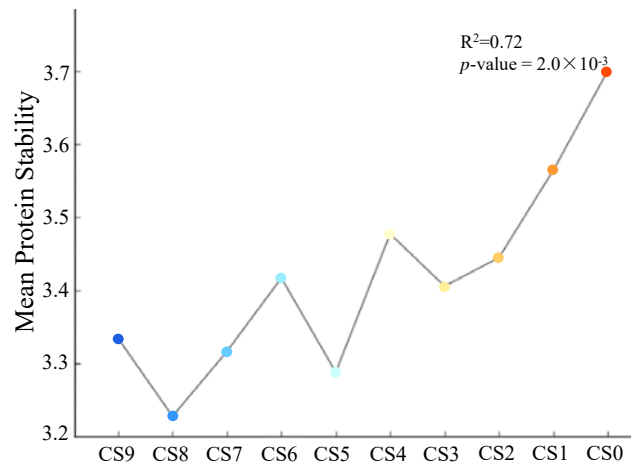**B**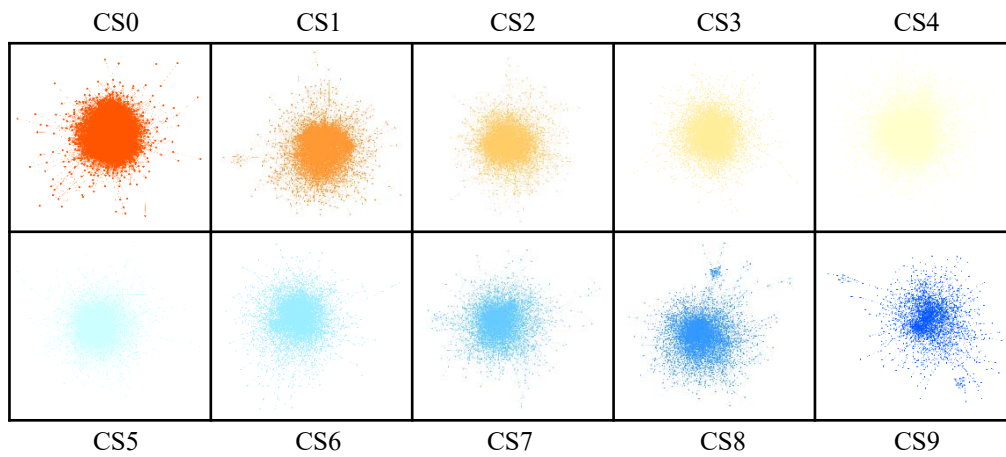

| Gene group | Number of nodes | Number of edges | Average node degree |
|------------|-----------------|-----------------|---------------------|
| CS0        | 1871            | 85728           | 91.6                |
| CS1        | 1872            | 14905           | 15.9                |
| CS2        | 1872            | 8986            | 9.6                 |
| CS3        | 1876            | 8798            | 9.38                |
| CS4        | 1874            | 8665            | 9.25                |
| CS5        | 1873            | 8922            | 9.53                |
| CS6        | 1873            | 8893            | 9.5                 |
| CS7        | 1873            | 8064            | 8.61                |
| CS8        | 1876            | 8421            | 8.98                |
| CS9        | 1103            | 3060            | 5.55                |

**Fig S1. Protein characteristics. (A)** Stability of proteins encoded by genes in different gene groups.  $R^2$  and  $p$ -value for linear regression are shown. **(B)** Top: PPI networks of 10 groups of genes. Bottom: topological properties of PPI networks.

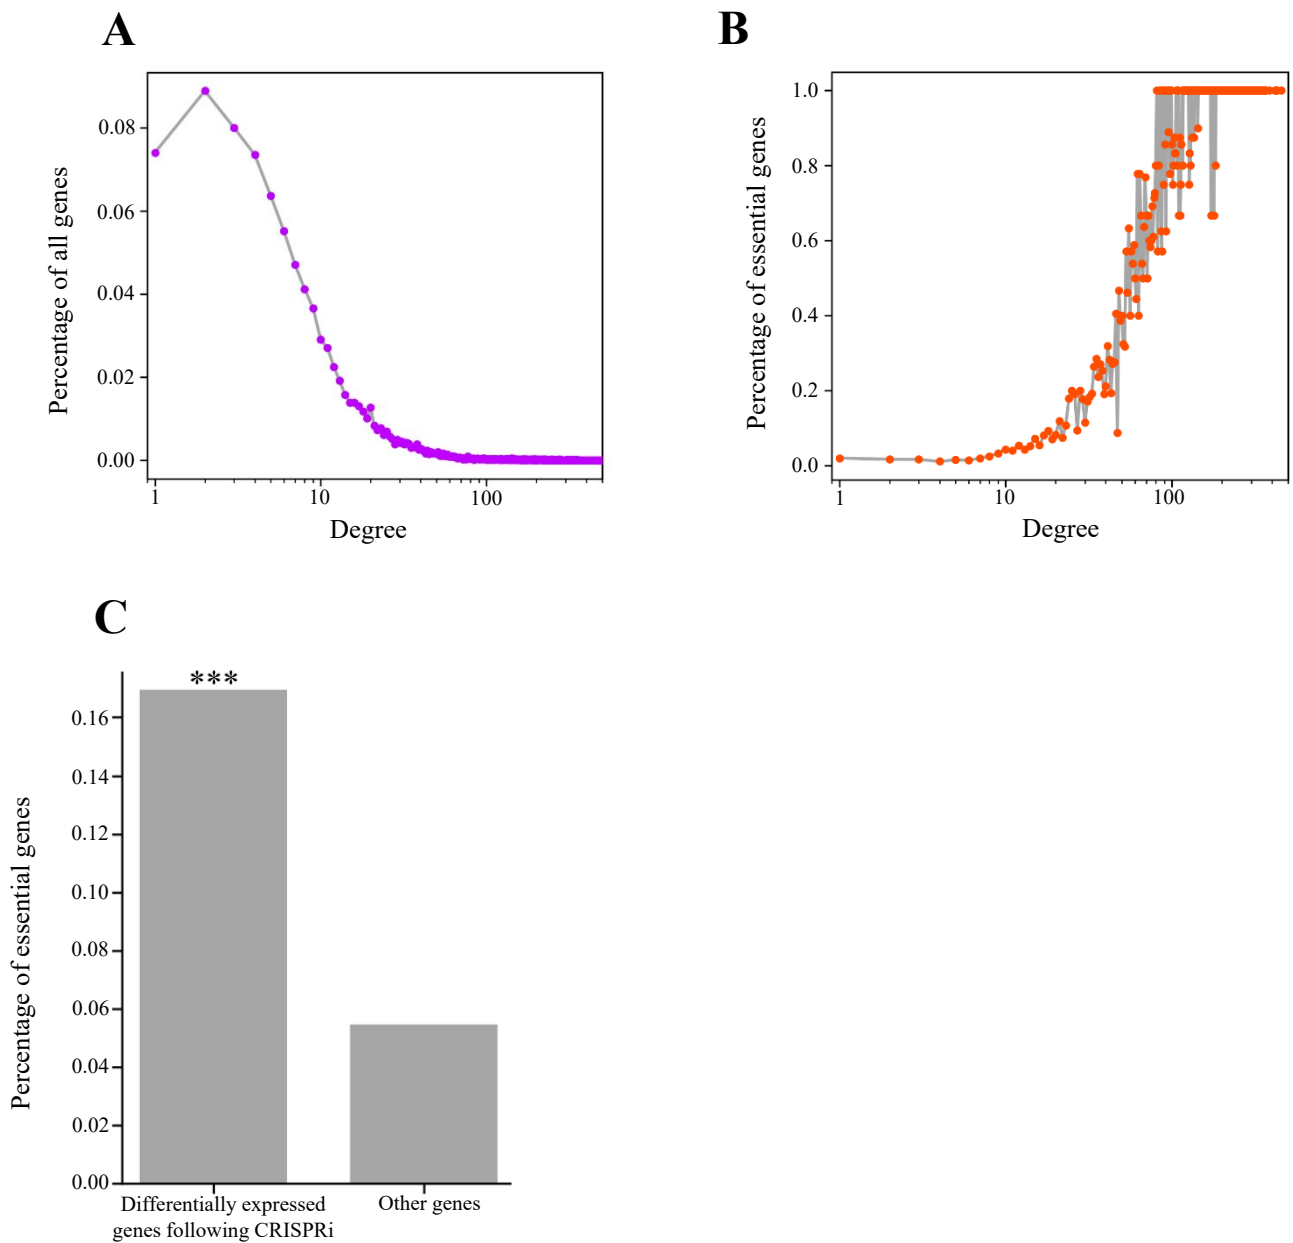

**Fig. S2. Regulatory characteristics.** Relationship between the degree of connectivity and the number of all genes **(A)** and the number of essential genes **(B)** in PPI network. **(C)** Proportion of essential genes in differentially expressed genes following lncRNA CRISPRi and in other genes. Significance: \*\*\* p-value < 0.0001, Fisher's exact test

| GO term                                                                         | CS1    | CS2   | CS3  | CS4  | CS5  | CS6  | CS7  | CS8 | CS9  | CS10 |
|---------------------------------------------------------------------------------|--------|-------|------|------|------|------|------|-----|------|------|
| rRNA processing                                                                 | 194.46 | 0     | 0    | 0    | 0    | 0    | 0    | 0   | 0    | 0    |
| translational initiation                                                        | 76.33  | 0     | 0    | 0    | 0    | 0    | 0    | 0   | 0    | 0    |
| nuclear-transcribed mRNA catabolic process, nonsense-mediated decay             | 66.16  | 0     | 0    | 0    | 0    | 0    | 0    | 0   | 0    | 0    |
| mRNA splicing, via spliceosome                                                  | 65.48  | 8.03  | 0    | 0    | 0    | 0    | 0    | 0   | 0    | 0    |
| translation                                                                     | 64.60  | 0     | 0    | 0    | 0    | 0    | 0    | 0   | 0    | 0    |
| viral transcription                                                             | 62.10  | 0     | 0    | 0    | 0    | 0    | 0    | 0   | 0    | 0    |
| SRP-dependent cotranslational protein targeting to membrane                     | 60.56  | 0     | 0    | 0    | 0    | 0    | 0    | 0   | 0    | 0    |
| mitochondrial translational elongation                                          | 57.98  | 0     | 0    | 0    | 0    | 0    | 0    | 0   | 0    | 0    |
| DNA replication                                                                 | 56.31  | 0     | 0    | 0    | 0    | 0    | 0    | 0   | 0    | 0    |
| mitochondrial translational termination                                         | 35.08  | 0     | 0    | 0    | 0    | 0    | 0    | 0   | 0    | 0    |
| transcription-coupled nucleotide-excision repair                                | 33.96  | 0     | 0    | 0    | 0    | 0    | 0    | 0   | 0    | 0    |
| mitochondrial respiratory chain complex I assembly                              | 0      | 11.63 | 0    | 0    | 0    | 0    | 0    | 0   | 0    | 0    |
| mitochondrial electron transport, NADH to ubiquinone                            | 0      | 9.19  | 0    | 0    | 0    | 0    | 0    | 0   | 0    | 0    |
| transcription, DNA-templated                                                    | 0      | 4.75  | 0    | 0    | 0    | 0    | 0    | 0   | 0    | 0    |
| DNA repair                                                                      | 0      | 4.50  | 0    | 0    | 0    | 0    | 0    | 0   | 0    | 0    |
| transcription elongation from RNA polymerase II promoter                        | 0      | 4.49  | 0    | 0    | 0    | 0    | 0    | 0   | 0    | 0    |
| snRNA transcription from RNA polymerase II promoter                             | 0      | 4.25  | 0    | 0    | 0    | 0    | 0    | 0   | 0    | 0    |
| transcription initiation from RNA polymerase II promoter                        | 0      | 4.19  | 0    | 0    | 0    | 0    | 0    | 0   | 0    | 0    |
| protein import into peroxisome matrix                                           | 0      | 4.00  | 0    | 0    | 0    | 0    | 0    | 0   | 0    | 0    |
| mitotic nuclear division                                                        | 0      | 3.95  | 0    | 0    | 0    | 0    | 0    | 0   | 0    | 0    |
| cell division                                                                   | 0      | 3.78  | 0    | 0    | 0    | 0    | 0    | 0   | 0    | 0    |
| negative regulation of neuron apoptotic process                                 | 0      | 0     | 3.74 | 0    | 0    | 0    | 0    | 0   | 0    | 0    |
| transport                                                                       | 0      | 0     | 0    | 4.49 | 0    | 0    | 0    | 0   | 0    | 0    |
| extracellular matrix disassembly                                                | 0      | 0     | 0    | 3.31 | 0    | 0    | 0    | 0   | 0    | 0    |
| positive regulation of GTPase activity                                          | 0      | 0     | 0    | 0    | 5.97 | 0    | 0    | 0   | 0    | 0    |
| vascular endothelial growth factor receptor signaling pathway                   | 0      | 0     | 0    | 0    | 3.57 | 0    | 0    | 0   | 0    | 0    |
| intracellular signal transduction                                               | 0      | 0     | 0    | 0    | 3.22 | 0    | 0    | 0   | 0    | 0    |
| regulation of GTPase activity                                                   | 0      | 0     | 0    | 0    | 3.10 | 0    | 0    | 0   | 0    | 0    |
| regulation of cell proliferation                                                | 0      | 0     | 0    | 0    | 3.01 | 0    | 0    | 0   | 0    | 0    |
| cell fate commitment                                                            | 0      | 0     | 0    | 0    | 0    | 4.41 | 0    | 0   | 0    | 0    |
| positive regulation of ERK1 and ERK2 cascade                                    | 0      | 0     | 0    | 0    | 0    | 3.60 | 0    | 0   | 0    | 0    |
| cell adhesion                                                                   | 0      | 0     | 0    | 0    | 0    | 0    | 4.39 | 0   | 0    | 0    |
| inflammatory response                                                           | 0      | 0     | 0    | 0    | 0    | 0    | 4.00 | 0   | 0    | 0    |
| lipid catabolic process                                                         | 0      | 0     | 0    | 0    | 0    | 0    | 3.62 | 0   | 0    | 0    |
| negative regulation of inflammatory response                                    | 0      | 0     | 0    | 0    | 0    | 0    | 3.57 | 0   | 0    | 0    |
| membrane repolarization during ventricular cardiac muscle cell action potential | 0      | 0     | 0    | 0    | 0    | 0    | 3.52 | 0   | 0    | 0    |
| potassium ion export                                                            | 0      | 0     | 0    | 0    | 0    | 0    | 3.20 | 0   | 0    | 0    |
| cell-cell signaling                                                             | 0      | 0     | 0    | 0    | 0    | 0    | 3.19 | 0   | 0    | 0    |
| homophilic cell adhesion via plasma membrane adhesion molecules                 | 0      | 0     | 0    | 0    | 0    | 0    | 0    | 0   | 3.70 | 0    |
| detection of chemical stimulus involved in sensory perception of bitter taste   | 0      | 0     | 0    | 0    | 0    | 0    | 0    | 0   | 0    | 3.92 |

$-\log_{10}(p\text{-value})$

**Fig. S3. GO analysis of 10 groups of genes.**

**A**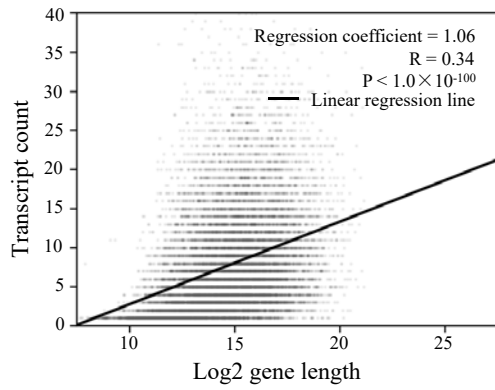**B**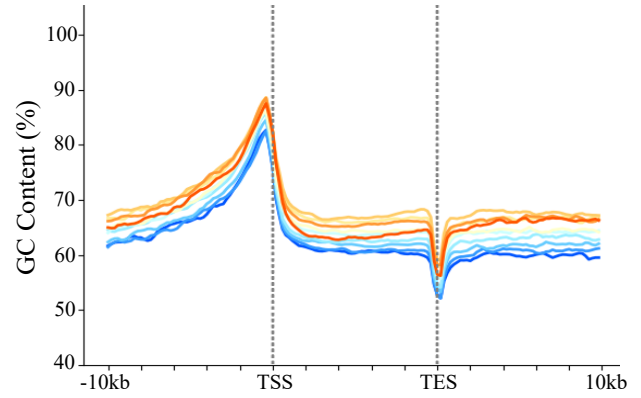**C**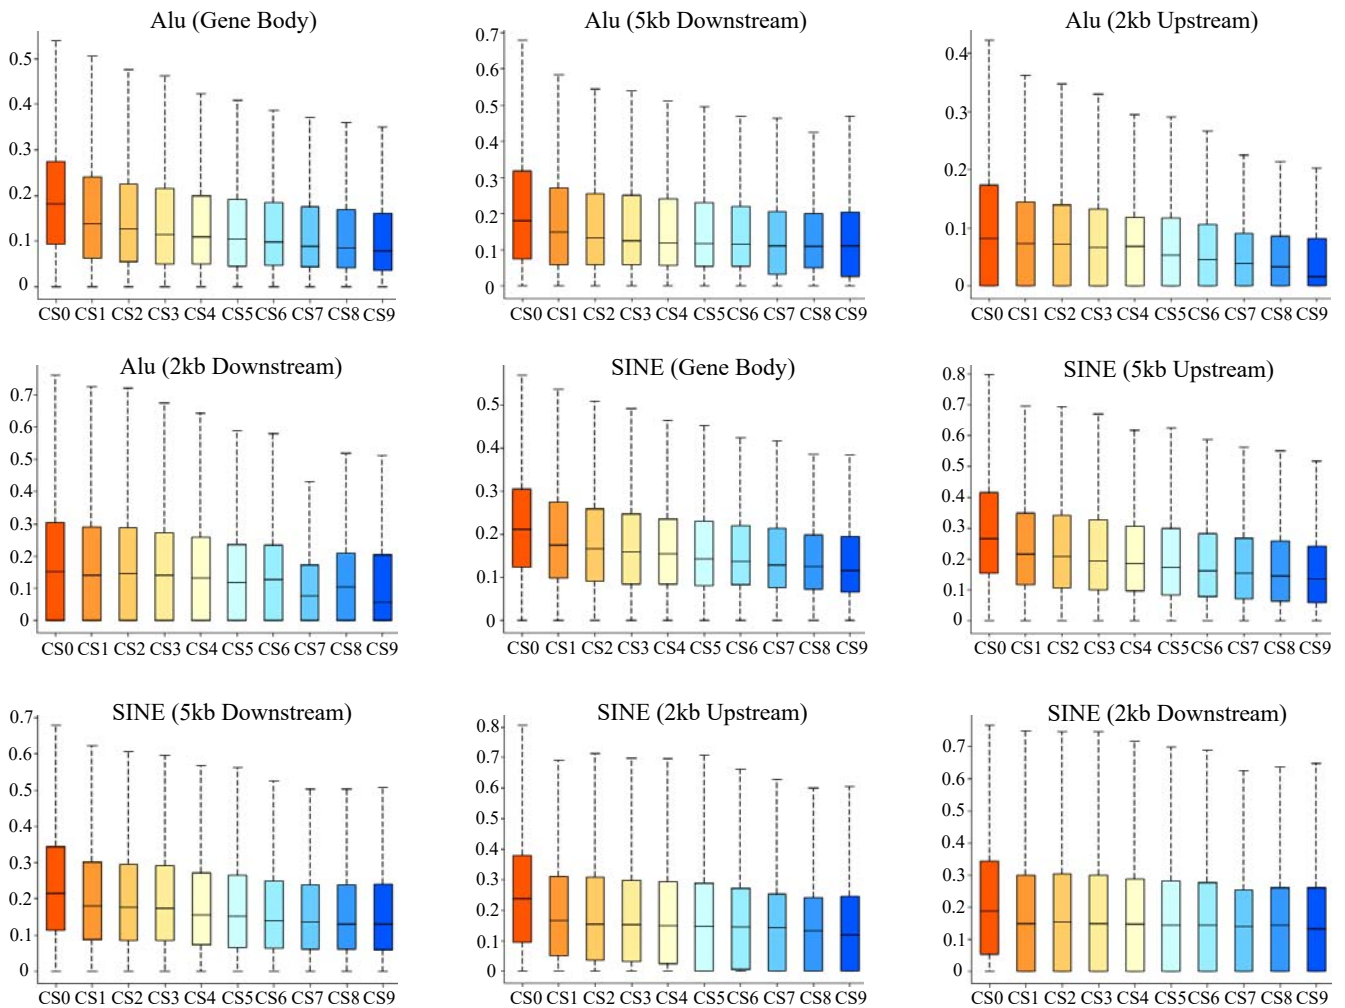

**Fig. S4. Sequences characteristics.** (A) Correlation between gene length and transcript count of all protein coding genes in 10 groups. Grey dots: all protein coding genes in 10 groups. Black line: fitted regression line. Regression coefficient,  $R^2$  and  $p$ -value for linear regression are shown. (B) GC content of regions 10-kb up- or downstream of gene body. Red line: human essential genes. Color of gene group changes from red to blue with increasing CS value (decreasing essentiality). (C) Repetitive elements of 10 groups of genes.

**A**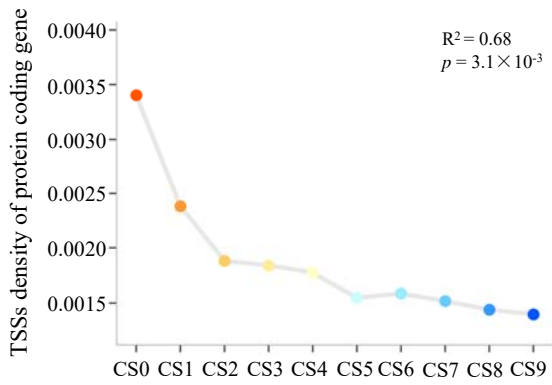**B**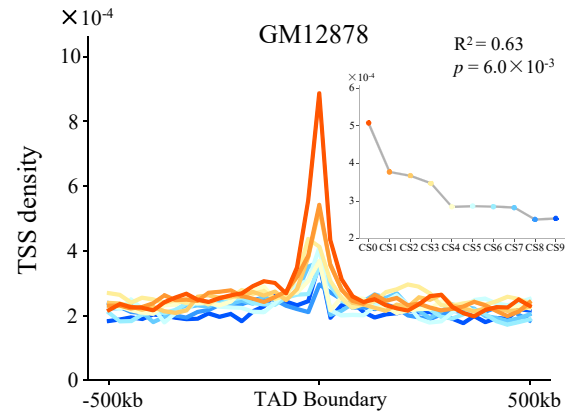**C**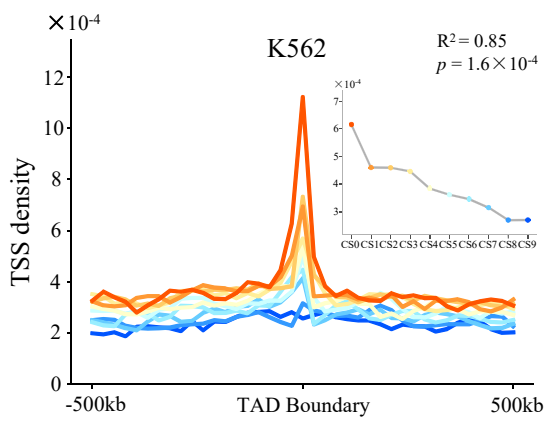**D**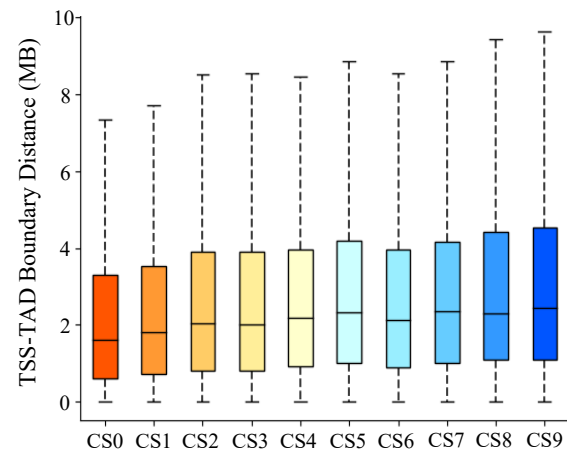**E**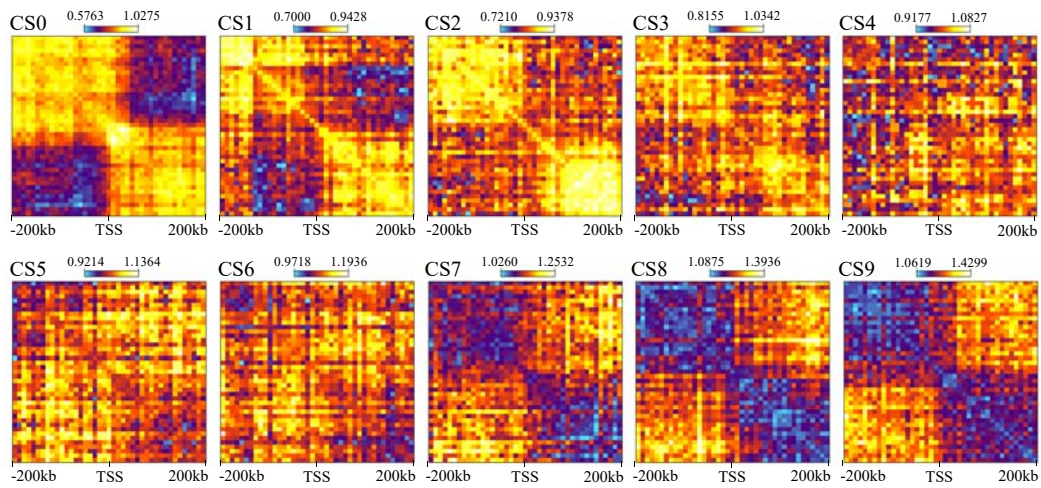



**Fig. S5. Structural characteristics.** (A) Level of overlap between 10 types of gene TSSs and all protein-coding gene TSSs.  $R^2$  and  $p$ -value for linear regression are shown. (B-C) Profiles of 10 types of TSSs near TAD boundary of (B) GM12878 or (C) K562. Inset: mean values of TAD boundary and near-boundary regions ( $\leq 100$ kb).  $R^2$  and  $p$ -value for linear regression of mean value of 10 gene groups of near-boundary regions ( $\leq 100$  kb) are shown. (D) Average distance between gene and nearest TAD boundary. (E) Mean Hi-C contact map near 10 types of TSSs. Value for each bin was normalized by dividing by the mean value of all bins of the same linear genomic distance.

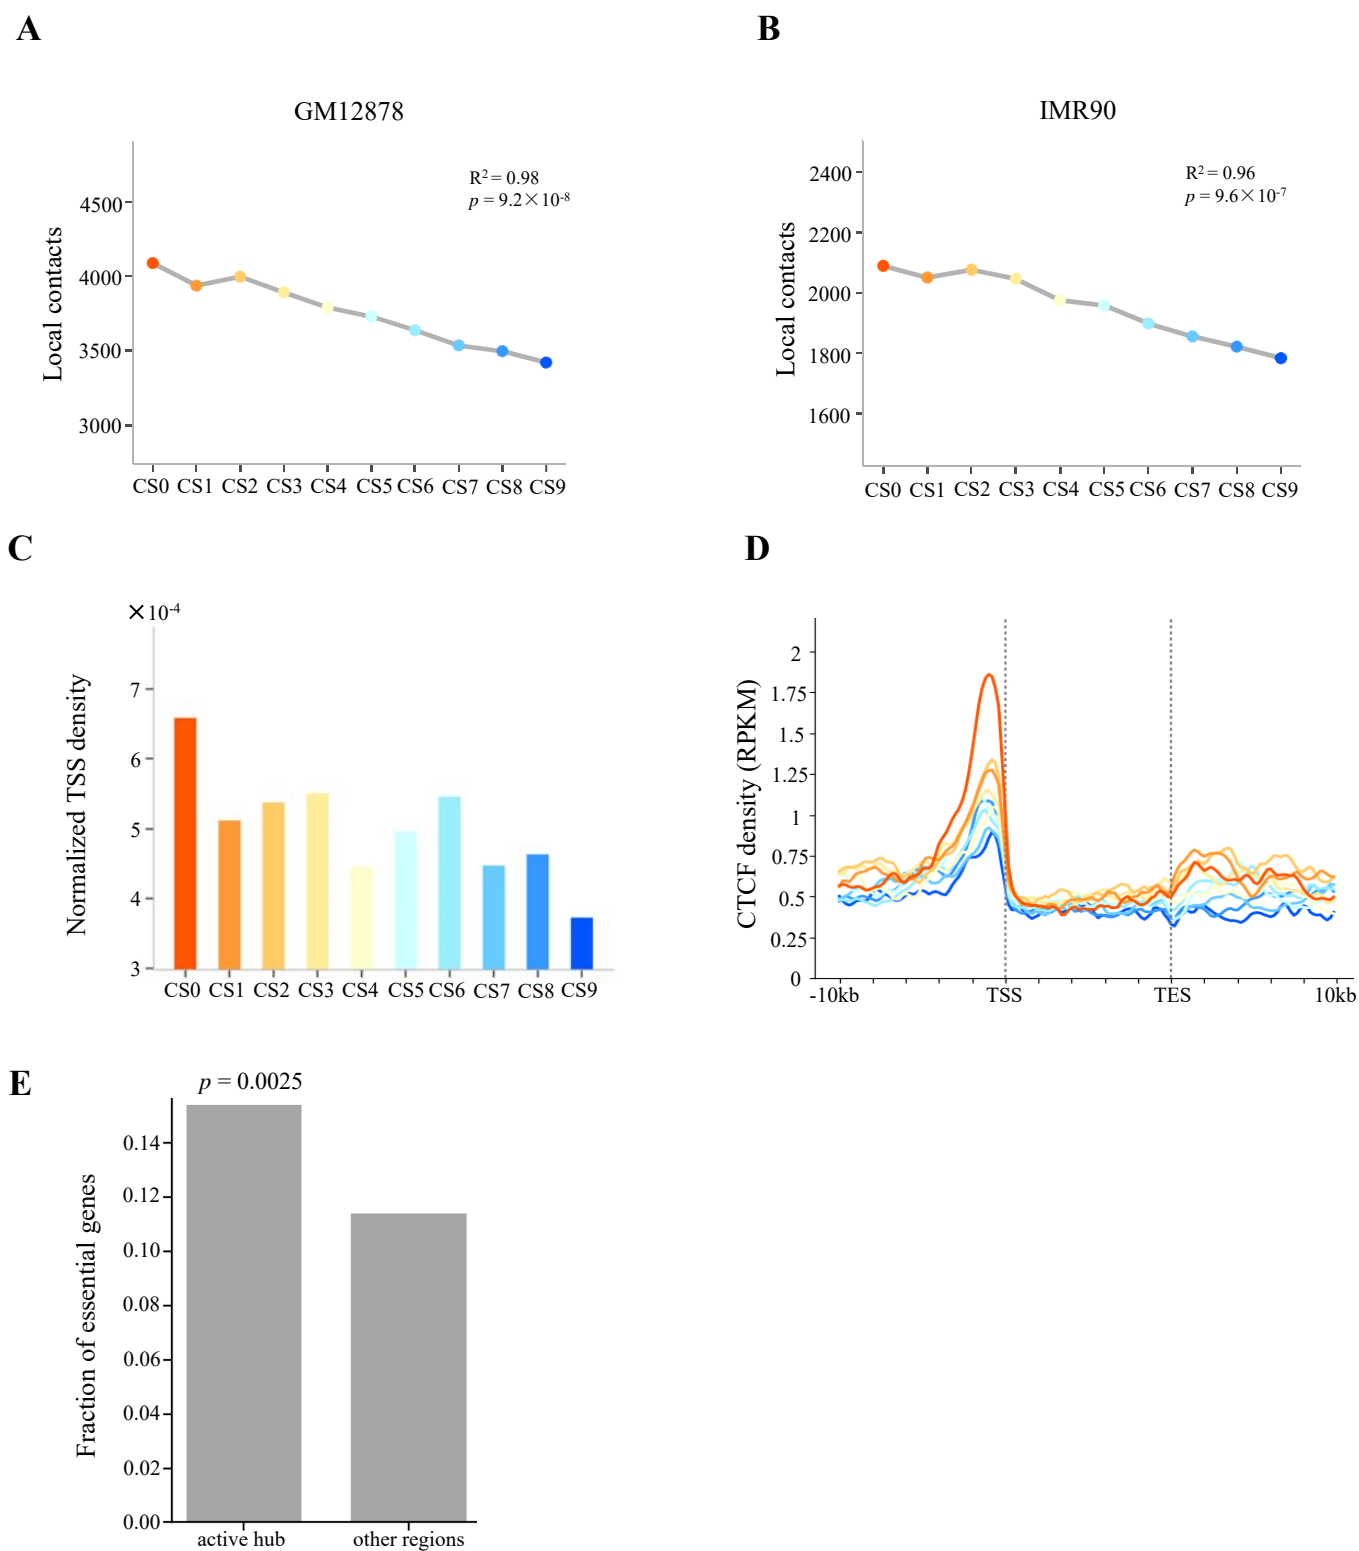

**Fig. S6. 3D structure.** (A-B) Mean intra-TAD local (<100 kb) Hi-C contacts for bins containing 10 types of TSSs in (A) GM12878 and (B) IMR90. For each bin containing a TSS, only contacts with bins in the opposite direction to the nearest TAD boundary were counted.  $R^2$  and  $p$ -value for linear regression are shown. (C) Level of overlap between 10 types of gene TSSs and GM12878 chromatin loop anchors. (D) ChIP-seq signal of CTCF in region 10-kb up- or downstream of gene body. (E) Fraction of essential genes in active inter-chromosome hubs and in other genomic regions. Significance:  $p$ -value = 0.0025, Fisher's exact test.

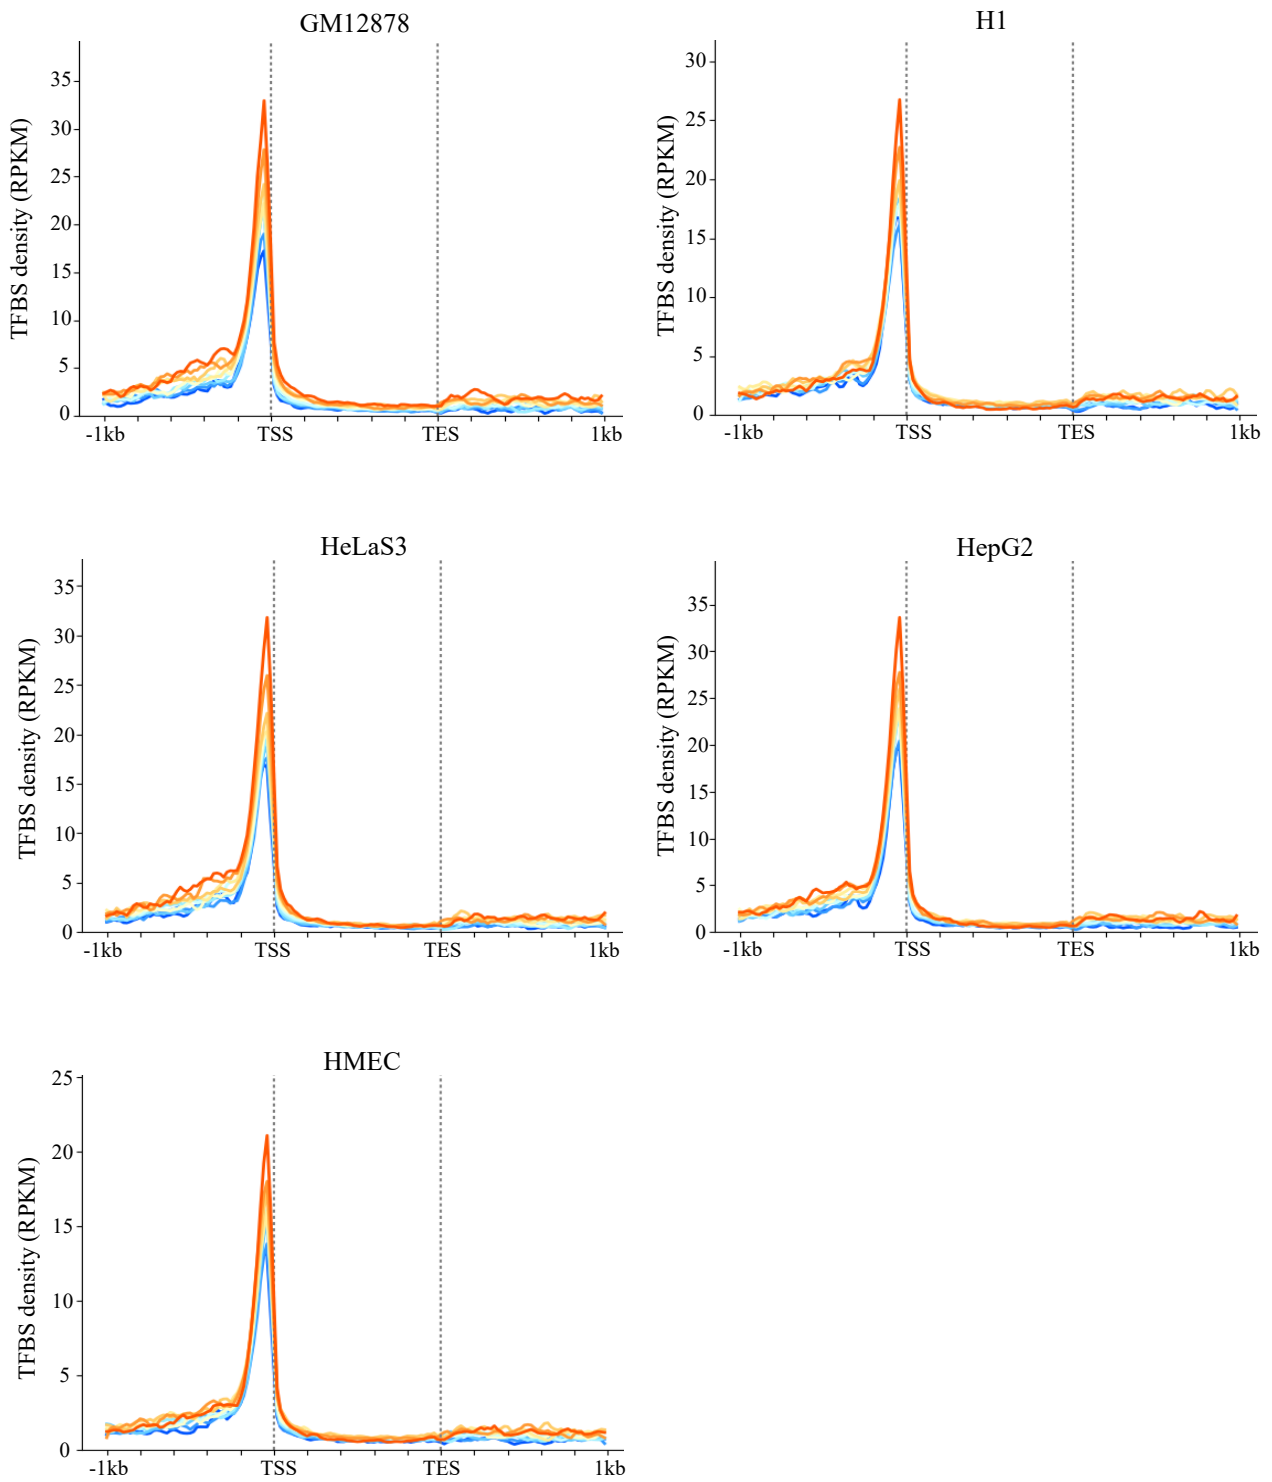

**Fig. S7. Distributions of transcription factor binding sites in regions 1-kb up- or downstream of gene body from five human cell lines.**

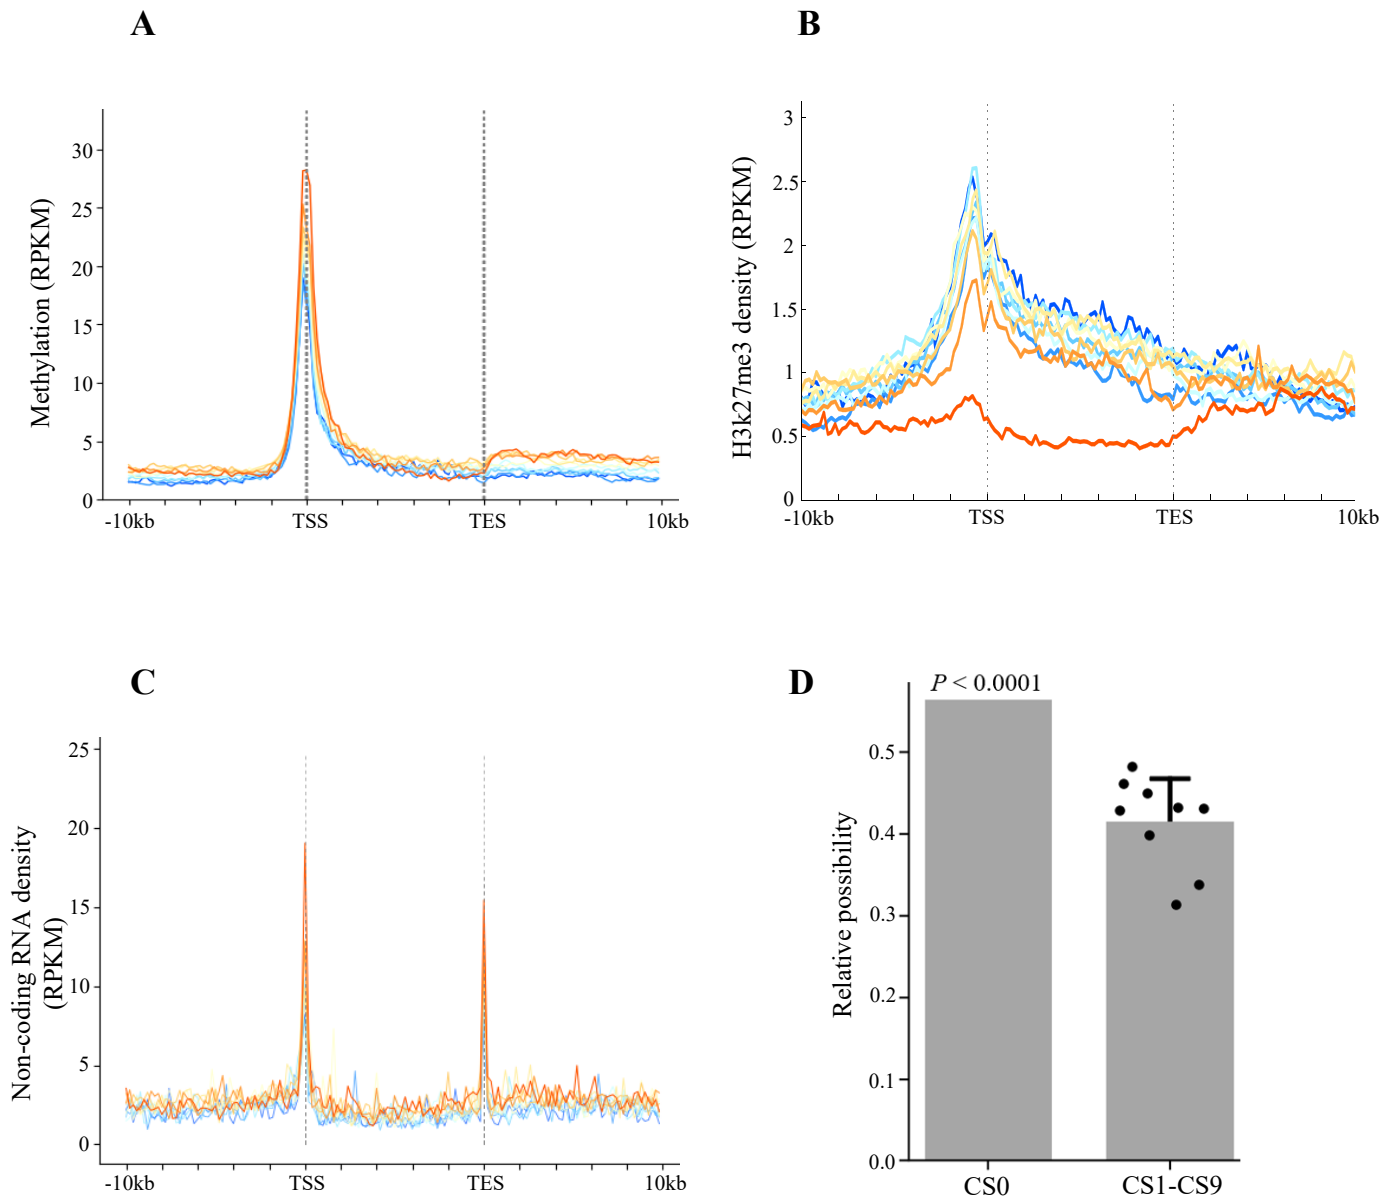

**Fig. S8. Epigenetic analyses.** Methylation level (MRE) (**A**), H3k27me3 density (**B**), and ncRNA distribution (**C**) in regions 10-kb up- or downstream of gene body. (**D**) Relative possibility of inactive epigenetic hub genes in essential gene group (CS0) and in other gene group (CS1-CS9). Significance:  $p$ -value  $< 0.0001$ , one-sample t-test.

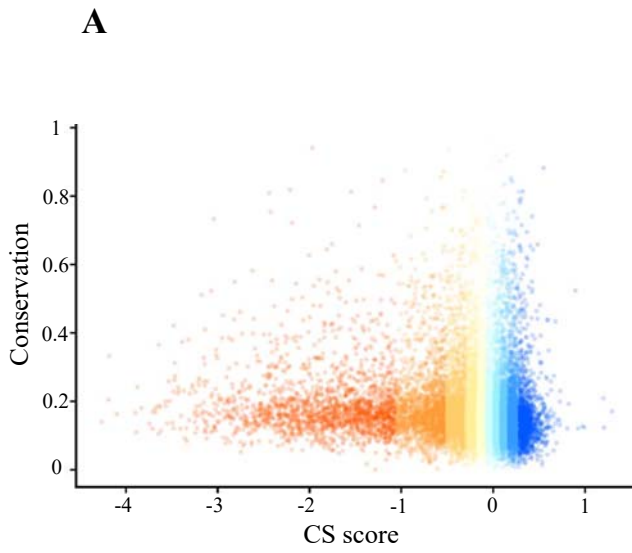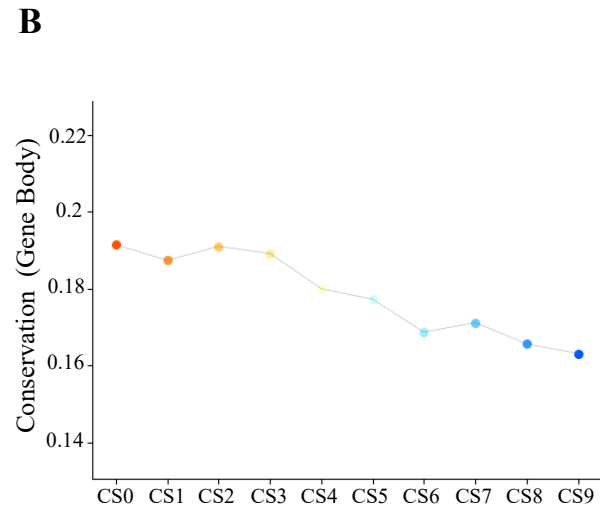

**Fig. S9. Essentiality and conservation. (A)** Relationship between CS value and conservation. **(B)** Average conservation of gene body regions.

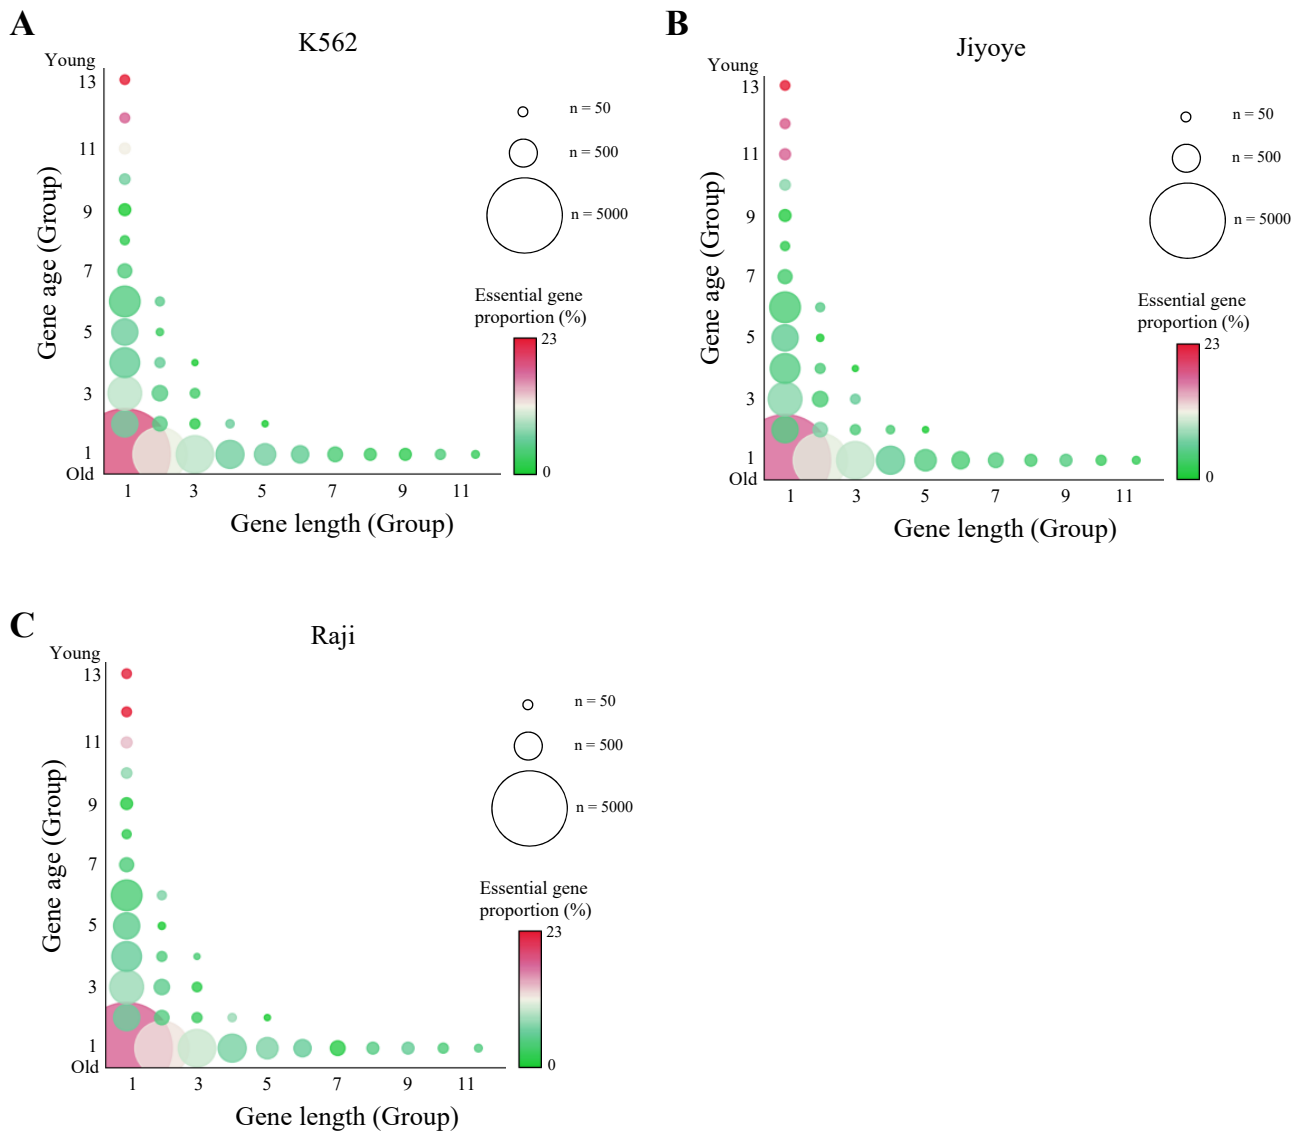

**Fig. S10. Essential genes proportion for different cell lines. (A-C),** Scatter-plot of gene length and evolutionary age. Size of the circle indicates number of genes; color represents essential gene proportion.

**A**

| GO term                                                 | P-value | Benjamini |
|---------------------------------------------------------|---------|-----------|
| regulation of Ras GTPase activity                       | 2.3E-04 | 0.037     |
| regulation of GTPase activity                           | 3.8E-04 | 0.030     |
| regulation of ARF GTPase activity                       | 4.9E-04 | 0.026     |
| regulation of ARF protein signal transduction           | 0.0012  | 0.049     |
| regulation of Ras protein signal transduction           | 0.0018  | 0.057     |
| regulation of small GTPase mediated signal transduction | 0.0030  | 0.079     |

**B**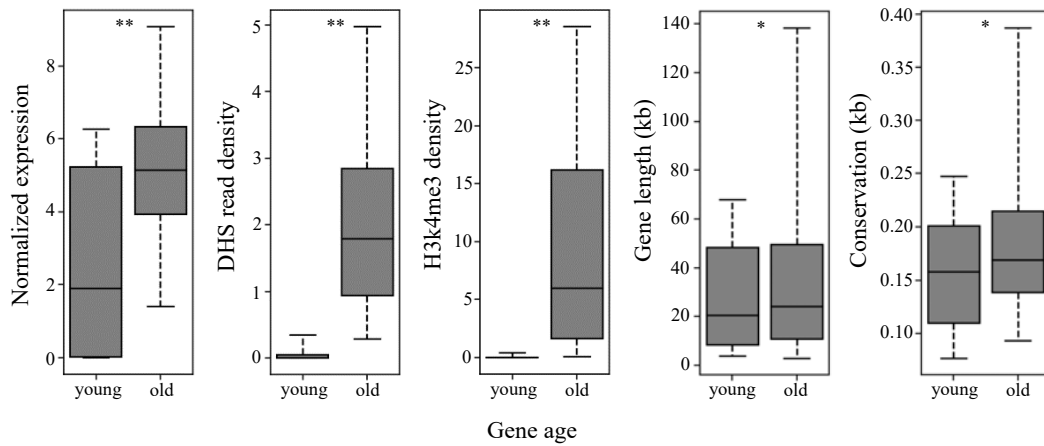

**Fig. S11. The difference between young essential genes (gene age group 12-13) and old essential genes. (A) GO analysis of young essential genes. (B) Difference of gene length and conservation between young essential genes and old essential genes. Significance: \*  $p < 0.05$ , \*\*  $p < 0.001$ .**

## Mus musculus

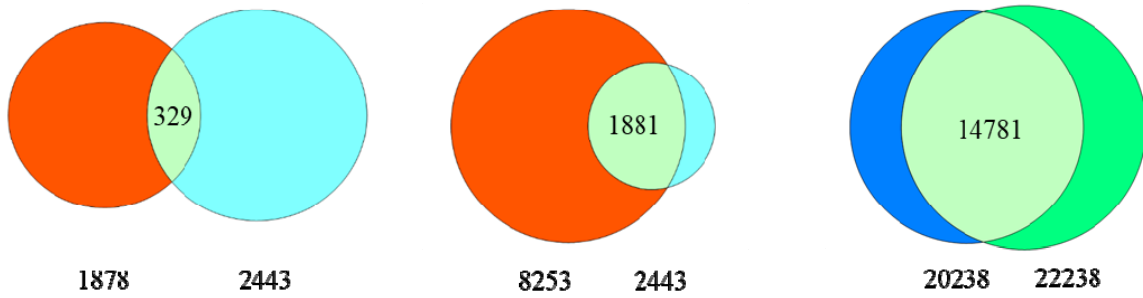

## Danio rerio

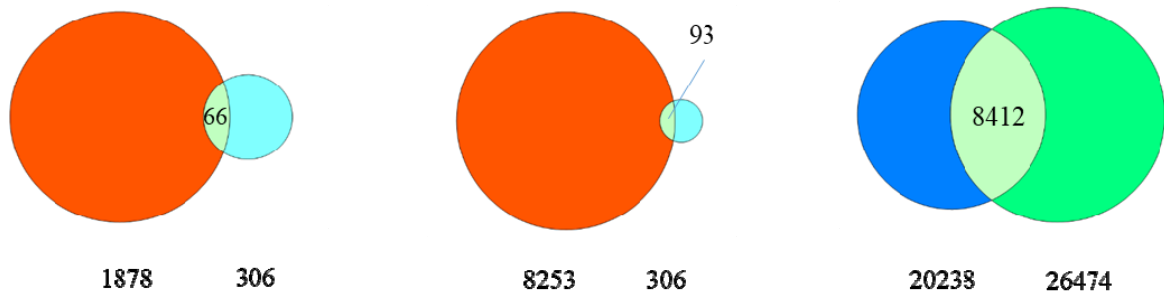

## Drosophila melanogaster

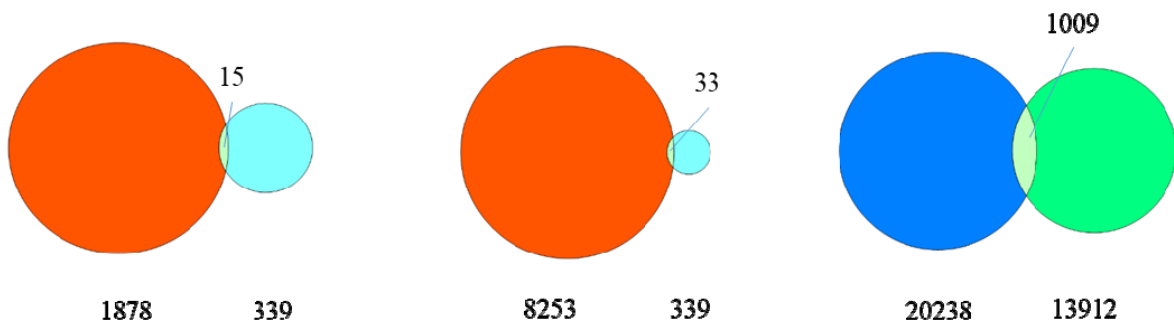

## Saccharomyces cerevisiae

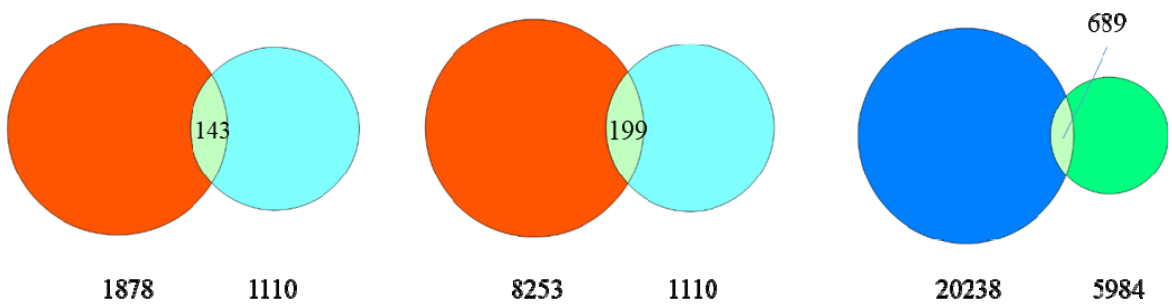

**Fig. S12. Comparison of homologous essential genes of different species.** Two different sets of human essential genes were used for analysis. The last column of Venn diagram is a comparison of human genes and genes of different species.



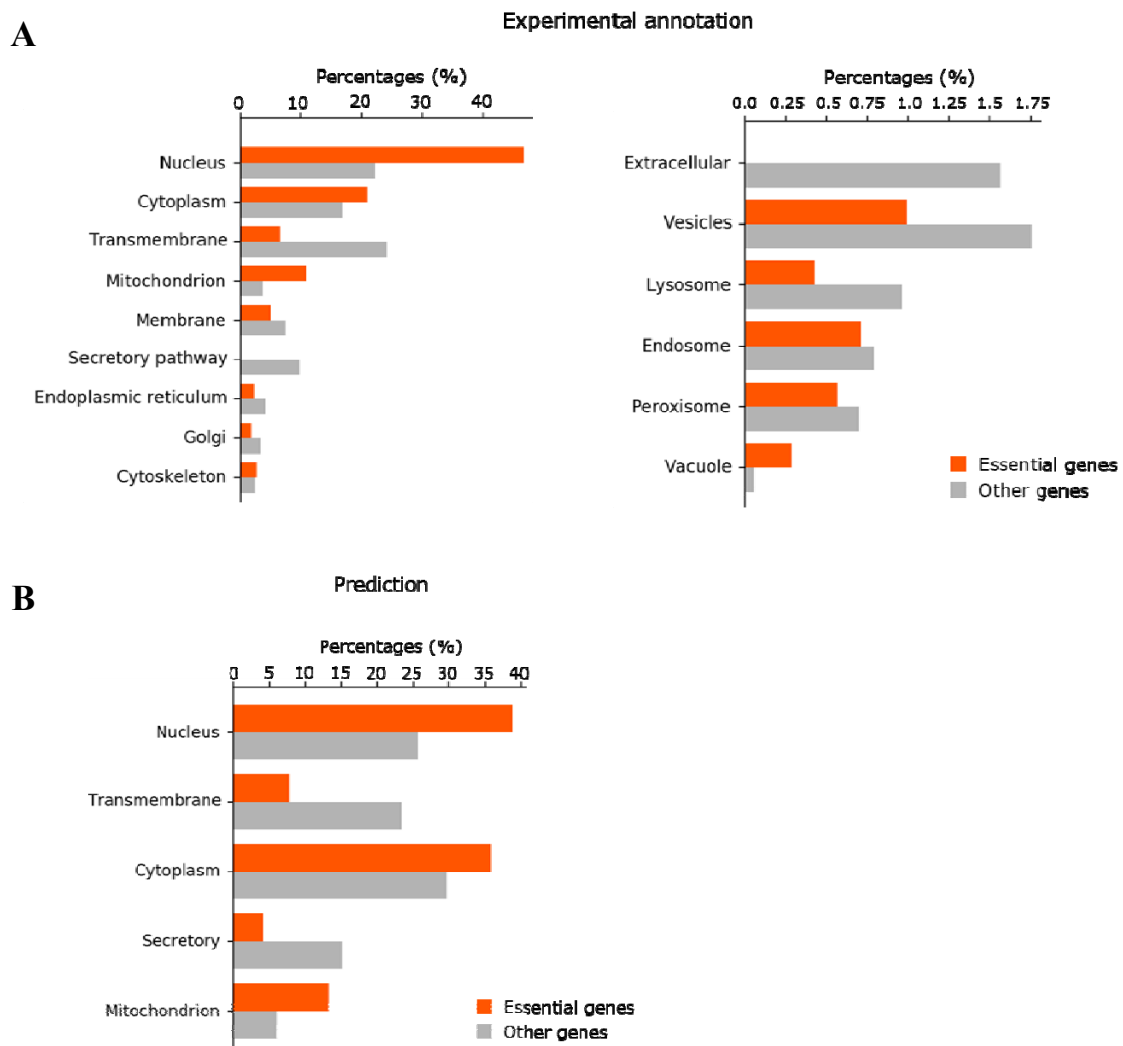

**Fig. S13. Protein localization analysis using experimental annotation and predicted data. (A)** Percentages of proteins located in different cellular locations for human essential genes (red bars) and human non-essential genes (grey bars) using experimental annotation data. **(B)** Percentages of proteins located in different cellular locations for human essential genes (red bars) and human non-essential genes (grey bars) using predicted data.

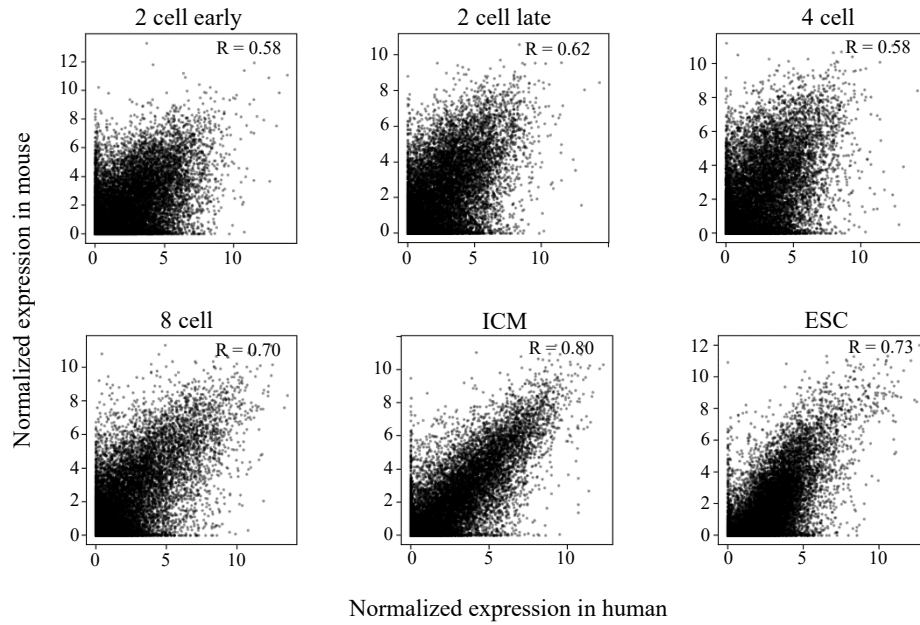

**Fig. S14. Gene expression similarity during human and mouse embryonic development . 2D-** Scatter plot of normalized gene expression. Correlation coefficients of normalized expression level between shared genes in human and mouse embryos are shown.

**A**

| Ref               | Cancer genes |      |      |      |      | Essential genes |
|-------------------|--------------|------|------|------|------|-----------------|
| Schroeder et al.  | 100%         | 39%  | 36%  | 46%  | 27%  | 24.56%          |
| Lawrence et al.   | 43%          | 100% | 33%  | 47%  | 29%  | 20.77%          |
| Kandoth et al.    | 80%          | 67%  | 100% | 70%  | 50%  | 24.41%          |
| Berger et al.     | 24%          | 23%  | 16%  | 100% | 22%  | 17.25%          |
| Vogelstein et al. | 62%          | 61%  | 51%  | 94%  | 100% | 23.20%          |

**B**

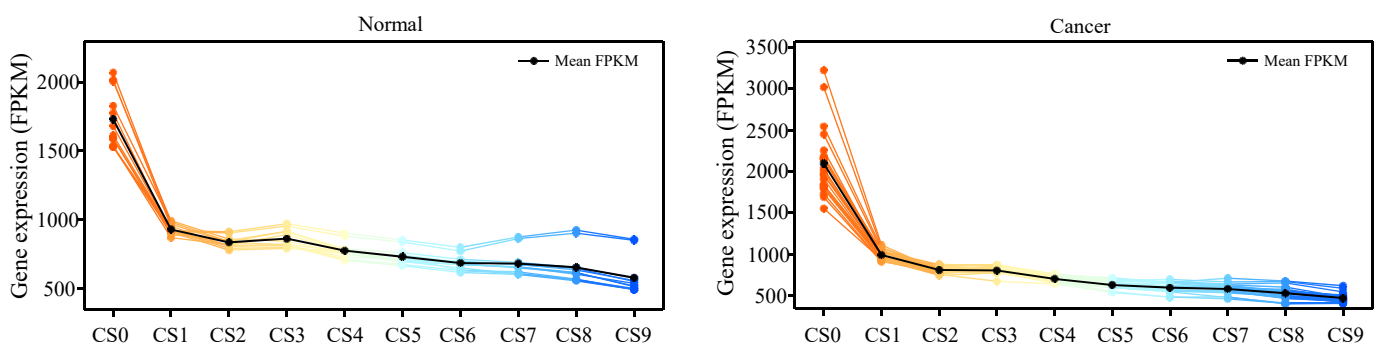

**Fig. S15. Relationship between human essential genes and cancer.** (A) Comparison of sets of human essential genes and cancer genes from different studies. Each value of the first five columns represents the common part between two studies, and the last column shows the proportion of essential genes in cancer genes for each study. (B) Gene expression in normal and tumor tissues from TCGA database, based on gene essentiality. Each colored line represents mean gene expression of all cancer or normal samples in each tumor type.

## Supplementary Table 1. Significantly differential expressed genes (DEGs) in cancer-normal tissue pairs.

| TCGA tumor | BLCA    |         | BRCA     |         | CESC    |         | CHOL     |         | COAD    |         | KICH     |         | KIRC     |         | KIRP     |         | LIHC    |         | LUAD     |         | PRAD    |         | UCEC    |         |         |
|------------|---------|---------|----------|---------|---------|---------|----------|---------|---------|---------|----------|---------|----------|---------|----------|---------|---------|---------|----------|---------|---------|---------|---------|---------|---------|
|            | log2FC  | pvalue  | log2FC   | pvalue  | log2FC  | pvalue  | log2FC   | pvalue  | log2FC  | pvalue  | log2FC   | pvalue  | log2FC   | pvalue  | log2FC   | pvalue  | log2FC  | pvalue  | log2FC   | pvalue  | log2FC  | pvalue  | log2FC  | pvalue  |         |
| AATF       | 4.1E-01 | 1.2E-02 | 4.7E-01  | 1.3E-09 | 4.1E-01 | 1.7E-01 | 1.2E+00  | 6.2E-03 | 6.6E-01 | 4.5E-07 | 4.5E-02  | 8.8E-01 | 7.9E-01  | 5.4E-01 | 2.7E-14  | 5.2E-01 | 1.2E-09 | 5.6E-01 | 1.2E-09  | 5.6E-01 | 1.2E-09 | 5.6E-01 | 1.2E-09 | 5.6E-01 | 1.2E-09 |
| AHHHD11    | 1.7E-01 | 6.1E-01 | 1.2E+00  | 9.9E-16 | 2.6E+00 | 4.2E-01 | 1.5E+00  | 4.6E-03 | 3.2E-01 | 5.8E-03 | 1.0E+00  | 1.3E-04 | 2.2E-01  | 4.9E-02 | 1.5E+00  | 4.1E-05 | 8.4E-01 | 2.2E-04 | 1.3E+00  | 2.1E-08 | 7.3E-01 | 7.5E-05 | 1.6E+00 | 2.9E-02 |         |
| ACLY       | 1.1E+00 | 5.1E-07 | 1.4E+00  | 1.5E-04 | 4.7E-02 | 9.3E-01 | 1.5E+00  | 1.4E-03 | 7.6E-01 | 4.5E-08 | 8.2E-01  | 1.4E-03 | 1.6E+00  | 8.8E-22 | 4.2E-01  | 1.7E-03 | 1.1E+00 | 7.6E-10 | 5.7E-01  | 7.3E-10 | 5.5E-01 | 2.5E-07 | 3.6E-01 | 2.6E-01 |         |
| ACTL6A     | 1.3E+00 | 2.8E-05 | 8.6E-01  | 9.2E-18 | 2.2E+00 | 2.7E-01 | 1.4E+00  | 2.6E-03 | 7.9E-01 | 2.1E-07 | 5.3E-01  | 1.3E-02 | 8.7E-02  | 1.4E-01 | 1.6E-01  | 1.9E-01 | 6.6E-01 | 1.7E-07 | 1.1E+00  | 1.0E-12 | 2.4E+00 | 8.7E-10 | 1.3E+00 | 3.6E-02 |         |
| ADRM1      | 4.3E-01 | 2.4E-03 | 6.5E-01  | 4.1E-09 | 8.0E-01 | 1.8E-01 | -1.7E-02 | 9.0E-01 | 1.0E+00 | 8.5E-07 | 2.4E-01  | 2.3E-02 | 3.7E-01  | 2.9E-05 | 5.2E-01  | 2.5E-03 | 2.3E-01 | 1.3E-02 | 5.0E-01  | 5.6E-09 | 7.8E-01 | 1.5E-10 | 6.0E-01 | 2.2E-02 |         |
| ADSS       | 4.7E-01 | 9.4E-04 | 9.0E-01  | 5.5E-22 | 4.2E+00 | 1.7E-01 | 1.4E+00  | 2.2E+00 | 1.4E-03 | 5.5E-03 | 4.1E-01  | 7.4E-05 | 5.6E-01  | 1.4E-08 | -2.0E-01 | 1.7E-01 | 4.1E-01 | 3.0E-05 | 6.7E-01  | 4.6E-09 | 8.8E-01 | 4.7E-09 | 6.6E-01 | 6.5E-02 |         |
| ALDOA      | 3.4E-01 | 4.0E-02 | 9.4E-01  | 6.3E-07 | 1.4E+00 | 1.7E-01 | 2.4E+00  | 1.7E-03 | 9.4E-02 | 2.6E-01 | 1.3E+00  | 3.3E-06 | 1.3E+00  | 3.8E-16 | 1.4E+00  | 1.6E-05 | 1.3E+00 | 5.7E-04 | 1.2E+00  | 5.4E-14 | 1.2E+00 | 5.9E-14 | 8.5E-01 | 2.0E-01 |         |
| ANAPC11    | 5.7E-01 | 4.7E-04 | 7.2E-01  | 3.7E-11 | 1.8E+00 | 3.7E-01 | -3.1E-01 | 1.8E-01 | 2.4E-01 | 4.3E-02 | 6.3E-03  | 9.7E-01 | 2.5E-02  | 7.9E-01 | 5.3E-01  | 2.3E-03 | 5.4E-01 | 3.0E-04 | 7.3E-01  | 3.9E-08 | 6.5E-01 | 1.1E-05 | 1.1E+00 | 6.2E-03 |         |
| AP2S1      | 4.2E-01 | 2.5E-03 | 7.3E-01  | 6.4E-18 | 1.6E+00 | 1.2E-01 | -3.6E-01 | 4.8E-02 | 1.9E-02 | 8.3E-01 | 3.6E-01  | 7.3E-05 | 5.2E-01  | 6.8E-07 | 4.0E-01  | 3.9E-03 | 4.7E-02 | 7.0E-01 | 3.3E-01  | 4.2E-05 | 7.0E-01 | 6.9E-06 | 1.2E+00 | 7.9E-04 |         |
| ATADS      | 2.2E+00 | 2.2E-07 | 1.0E+00  | 9.3E-09 | 3.3E+00 | 1.9E-01 | 2.8E+00  | 2.6E-03 | 1.4E+00 | 5.1E-06 | 1.9E-01  | 6.4E-01 | 9.8E-01  | 2.7E-08 | 1.4E+00  | 2.9E-04 | 1.6E+00 | 4.4E-06 | 1.8E+00  | 5.2E-09 | 2.8E+00 | 2.0E-13 | 1.4E+00 | 1.1E-02 |         |
| ATPC       | 4.7E-01 | 1.5E-02 | 8.8E-01  | 2.6E-23 | 4.6E-01 | 6.3E-01 | 1.3E+00  | 1.1E-05 | 8.8E-01 | 5.4E-09 | -9.9E-01 | 1.6E-02 | 5.3E-02  | 4.2E-01 | 7.9E-01  | 3.2E-05 | 6.7E-01 | 2.5E-08 | 1.3E+00  | 2.3E-20 | 1.1E+00 | 3.9E-10 | 1.1E+00 | 6.8E-03 |         |
| ATPV61F    | 4.7E-01 | 1.3E-02 | 6.1E-01  | 1.1E-13 | 1.1E-01 | 4.4E-01 | 1.1E+00  | 1.4E-03 | 9.2E-01 | 3.0E-07 | 1.1E+00  | 9.8E-07 | 2.3E-02  | 8.4E-01 | 6.6E-01  | 1.3E-04 | 8.0E-01 | 9.9E-06 | -2.6E-02 | 7.8E-01 | 1.2E-01 | 3.1E-01 | 5.6E-01 | 1.8E-03 |         |
| ATR        | 7.1E-01 | 4.0E-03 | -3.4E-02 | 5.4E-01 | 6.1E-01 | 4.3E-01 | 1.4E+00  | 2.2E-03 | 8.4E-01 | 1.3E-06 | 5.8E-01  | 1.9E-03 | -1.3E-01 | 3.1E-01 | 2.3E-01  | 1.9E-02 | 5.8E-01 | 5.3E-06 | 6.1E-01  | 9.5E-10 | 1.1E+00 | 2.3E-11 | 3.4E-01 | 3.3E-01 |         |
| ATXN2L     | 8.5E-01 | 2.0E-04 | 4.4E-01  | 2.0E-14 | 5.1E-01 | 2.4E-01 | 1.2E+00  | 1.3E-05 | 6.3E-01 | 8.9E-08 | 1.1E+00  | 4.2E-08 | 5.5E-01  | 3.1E-16 | 8.7E-01  | 5.1E-10 | 6.0E-01 | 3.9E-08 | 5.8E-01  | 1.5E-10 | 6.7E-01 | 7.9E-13 | 2.8E-01 | 2.6E-01 |         |
| AURKA      | 2.3E+00 | 2.4E-06 | 2.9E+00  | 8.1E-20 | 4.4E+00 | 4.7E-02 | 2.8E+00  | 6.4E-03 | 1.5E+00 | 3.0E-07 | 2.7E+00  | 6.3E-06 | 1.0E+00  | 3.1E-06 | 1.9E+00  | 1.1E-04 | 2.5E+00 | 1.0E-08 | 2.7E+00  | 2.8E-11 | 3.3E+00 | 3.2E-12 | 3.5E+00 | 2.6E-03 |         |
| AURKB      | 2.1E+00 | 6.5E-06 | 2.7E+00  | 2.0E-15 | 5.9E+00 | 3.0E-02 | 5.3E+00  | 7.3E-03 | 9.0E-01 | 5.8E-05 | 2.5E+00  | 8.8E-01 | 2.4E+00  | 7.2E-08 | 3.9E+00  | 9.4E-04 | 3.2E+00 | 5.3E-10 | 3.4E+00  | 1.6E-10 | 4.6E+00 | 1.0E-14 | 4.4E+00 | 1.3E-02 |         |
| AZ1        | 1.1E+00 | 5.2E-06 | 5.0E-01  | 4.8E-05 | 9.2E-01 | 4.8E-02 | 2.2E+00  | 1.4E-03 | 9.2E-01 | 9.1E-05 | 8.8E-01  | 2.0E-05 | 3.4E-01  | 1.7E-04 | 7.5E-01  | 8.4E-05 | 1.8E+00 | 2.4E-11 | 7.2E-01  | 1.5E-06 | 8.7E-01 | 1.0E-06 | 7.4E-01 | 2.1E-02 |         |
| BANF1      | 6.6E-01 | 2.6E-04 | 6.5E-01  | 1.1E-15 | 3.6E-01 | 8.5E-02 | 4.9E-01  | 1.3E-01 | 4.0E-01 | 3.7E-04 | 6.0E-01  | 2.4E-04 | 1.5E-01  | 6.8E-02 | 5.1E-01  | 3.2E-04 | 5.2E-01 | 1.3E-06 | 4.6E-01  | 2.4E-08 | 8.1E-01 | 5.0E-08 | 3.4E-01 | 6.1E-01 |         |
| BIRC5      | 1.9E+00 | 1.2E-04 | 2.9E+00  | 1.7E-17 | 5.3E+00 | 1.1E-01 | 5.3E+00  | 1.4E-02 | 1.2E+00 | 4.5E-06 | 2.2E+00  | 3.8E-02 | 2.4E+00  | 6.9E-07 | 3.7E+00  | 3.7E-04 | 7.4E-09 | 4.1E+00 | 1.0E+00  | 4.9E-05 | 5.0E+00 | 5.0E-05 | 5.0E+00 | 3.0E-03 |         |
| BOP1       | 8.3E-01 | 3.7E-03 | 1.2E+00  | 6.0E-10 | 1.6E+00 | 2.0E-01 | 1.8E+00  | 1.1E-02 | 1.8E+00 | 3.5E-06 | 1.1E+00  | 4.6E-03 | 6.8E-01  | 5.6E-06 | 6.4E-01  | 2.3E-02 | 1.9E+00 | 6.3E-06 | 2.0E+00  | 1.2E-09 | 2.5E+00 | 2.7E-08 | 1.8E+00 | 1.6E-02 |         |
| BRCA1      | 1.5E+00 | 4.9E-06 | 1.1E+00  | 7.8E-14 | 2.9E+00 | 4.6E-02 | 1.2E+00  | 6.2E-02 | 1.2E+00 | 6.0E-06 | 1.8E-01  | 6.7E-01 | 9.8E-01  | 3.1E-10 | 1.8E+00  | 1.7E-05 | 8.2E-01 | 4.5E-06 | 1.6E+00  | 2.7E-09 | 2.2E+00 | 3.3E-13 | 1.2E+00 | 1.2E-01 |         |
| BRCA2      | 2.0E+00 | 4.2E-04 | 1.5E+00  | 3.6E-14 | 3.7E+00 | 1.6E-01 | 2.1E+00  | 5.2E-03 | 1.9E+00 | 5.4E-09 | 6.8E-01  | 2.1E-01 | 1.8E+00  | 2.9E-11 | 1.9E+00  | 2.7E-04 | 1.5E+00 | 9.5E-06 | 1.0E+00  | 8.6E-09 | 1.7E+00 | 3.2E-07 | 1.9E+00 | 4.3E-02 |         |
| BRX1       | 7.4E-01 | 2.0E-02 | 5.5E-01  | 1.5E-10 | 1.1E-01 | 1.1E-01 | 1.1E+00  | 2.2E-03 | 1.1E-01 | 4.1E-08 | 5.4E-01  | 5.4E-01 | 3.1E-01  | 4.4E-06 | 2.2E-01  | 8.9E-02 | 4.5E-01 | 2.1E-05 | 1.2E+00  | 2.1E-11 | 7.7E-01 | 1.3E-01 | 6.4E-01 | 9.9E-02 |         |
| BUB1B      | 2.2E+00 | 4.0E-06 | 2.6E+00  | 4.4E-20 | 5.8E+00 | 1.3E-01 | 5.4E+00  | 3.4E-03 | 1.3E+00 | 2.6E-06 | 2.4E+00  | 5.2E-02 | 1.3E+00  | 1.5E-07 | 2.5E+00  | 1.4E-04 | 3.6E+00 | 6.9E-09 | 3.9E+00  | 5.2E-12 | 4.7E+00 | 2.3E-14 | 4.0E+00 | 6.1E-03 |         |
| BYSL       | 2.2E-01 | 2.2E-01 | 6.5E-01  | 5.7E-15 | 3.9E-01 | 2.4E-01 | 1.5E+00  | 4.9E-05 | 6.3E-01 | 8.9E-04 | 1.1E+00  | 4.2E-08 | 5.9E-01  | 8.1E-12 | 5.6E-01  | 8.3E-04 | 6.2E-01 | 6.6E-06 | 1.2E+00  | 3.0E-13 | 1.3E+00 | 3.1E-09 | 5.1E-01 | 3.7E-02 |         |
| C12orf45   | 5.2E-01 | 4.0E-04 | 2.3E-01  | 2.1E-03 | 1.4E+00 | 3.8E-01 | 2.5E-01  | 2.8E-01 | 7.4E-01 | 6.9E-07 | 5.8E-01  | 1.2E-02 | 8.4E-01  | 6.5E-12 | 1.3E+00  | 8.2E-05 | 5.4E-01 | 4.5E-04 | 9.0E-01  | 2.5E-12 | 8.6E-01 | 2.0E-06 | 1.4E+00 | 5.1E-02 |         |
| C14orf80   | 6.0E-01 | 9.7E-04 | 1.1E+00  | 7.6E-18 | 3.1E+00 | 2.5E-01 | 2.6E-01  | 6.0E-01 | 4.2E-01 | 2.3E-02 | 1.9E-01  | 4.1E-01 | 6.0E-01  | 2.5E-05 | 9.8E-01  | 2.9E-05 | 2.7E-01 | 5.1E-01 | 2.6E-01  | 3.8E-02 | 8.1E-01 | 3.6E-06 | 1.8E+00 | 8.0E-02 |         |
| C16orf59   | 2.1E+00 | 1.5E-03 | 2.4E+00  | 6.5E-22 | 4.5E+00 | 1.5E-01 | 3.9E+00  | 5.0E-03 | 1.2E+00 | 2.7E-09 | 1.1E+00  | 1.9E-02 | 8.2E-01  | 4.8E-04 | 2.6E+00  | 2.2E-07 | 2.8E+00 | 5.0E-08 | 3.5E+00  | 1.2E-12 | 4.0E+00 | 4.1E-13 | 3.5E+00 | 3.5E-03 |         |
| CASC5      | 1.9E+00 | 4.6E-05 | 2.5E+00  | 6.3E-19 | 6.2E+00 | 2.0E-01 | 6.3E-01  | 2.4E-01 | 1.3E+00 | 2.5E-15 | 1.3E+00  | 3.8E-02 | -3.0E-01 | 1.1E-01 | -7.9E-01 | 2.6E-03 | 1.2E+00 | 7.2E-04 | 3.0E+00  | 3.6E-11 | 3.8E+00 | 2.8E-14 | 3.3E+00 | 3.3E-02 |         |
| CCAR1      | 5.1E-01 | 2.6E-04 | 5.3E-01  | 3.3E-17 | 8.1E-01 | 1.1E-01 | 1.2E+00  | 6.3E-04 | 1.1E+00 | 1.0E-06 | -1.6E-01 | 1.0E-01 | -1.1E-01 | 4.0E-02 | -1.4E-02 | 8.3E-01 | 5.0E-01 | 2.6E-07 | 6.7E-01  | 2.4E-16 | 7.4E-01 | 1.4E-10 | 6.6E-01 | 1.3E-02 |         |
| CCND8      | 6.4E-01 | 8.7E-03 | 1.9E-01  | 7.5E-03 | 2.2E-01 | 6.8E-01 | 1.1E+00  | 1.1E-02 | 1.3E+00 | 3.6E-14 | 6.2E-01  | 1.2E-04 | 5.7E-01  | 3.2E-12 | 5.2E-01  | 2.2E-04 | 6.2E-01 | 1.4E-07 | 9.4E-01  | 8.3E-14 | 1.3E+00 | 2.2E-11 | 3.8E-01 | 1.7E-01 |         |
| CCNA2      | 1.6E+00 | 1.0E-04 | 2.6E+00  | 1.3E-17 | 4.4E+00 | 1.8E-01 | 4.1E+00  | 1.1E-02 | 1.0E+00 | 7.9E-06 | 2.7E+00  | 1.6E-02 | 1.9E+00  | 1.3E-08 | 2.6E+00  | 3.2E-05 | 3.9E+00 | 4.9E-03 | 3.1E+00  | 2.0E-11 | 4.1E+00 | 1.1E-12 | 3.0E+00 | 3.0E-03 |         |
| CCT2       | 5.5E-01 | 1.6E-03 | 6.5E-01  | 3.7E-14 | 4.7E-01 | 2.7E-01 | 2.2E+00  | 1.8E-01 | 7.5E-01 | 5.5E-06 | -2.3E-01 | 4.0E-02 | -2.6E-02 | 5.1E-01 | 3.2E-01  | 4.4E-04 | 5.6E-01 | 1.3E-07 | 1.7E+00  | 9.5E-01 | 9.3E-10 | 7.3E-01 | 3.2E-02 |         |         |
| CCT3       | 7.2E-01 | 3.6E-06 | 1.1E+00  | 7.9E-24 | 5.3E-01 | 3.1E-01 | 1.4E+00  | 1.2E-03 | 8.3E-01 | 4.1E-08 | 5.4E-01  | 5.4E-01 | 2.9E-02  | 5.5E-01 | 3.1E-01  | 2.0E-03 | 1.3E+00 | 1.8E-06 | 1.5E-00  | 1.6E-12 | 1.4E+00 | 4.3E-13 | 9.6E-01 | 7.9E-03 |         |
| CCT5       | 1.3E+00 | 7.7E-03 | 8.2E-01  | 3.3E-17 | 1.4E+00 | 1.8E-01 | 1.2E+00  | 3.0E-03 | 6.9E-01 | 2.3E-08 | 1.4E-01  | 3.3E-01 | 2.1E-01  | 3.2E-04 | 5.4E-01  | 3.0E-04 | 7.3E-01 | 3.6E-08 | 1.3E+00  | 6.2E-14 | 1.7E+00 | 1.9E-13 | 1.1E+00 | 4.3E-02 |         |
| CCT6A      | 1.1E+00 | 7.5E-02 | 8.3E-01  | 2.5E-04 | 7.9E-01 | 2.0E-01 | 1.2E+00  | 2.2E-04 | 1.1E+00 | 7.1E-10 | 3.1E-03  | 3.3E-03 | 1.1E-01  | 4.7E-02 | 6.1E-01  | 3.0E-06 | 9.3E-01 | 1.0E-10 | 1.6E+00  | 8.0E-03 | 1.8E+00 | 9.8E-04 | 9.5E-01 | 8.1E-04 |         |
| CDC20      | 2.2E+00 | 4.9E-06 | 3.0E+00  | 1.5E-14 | 6.0E+00 | 3.3E-02 | 6.1E+00  | 1.5E-02 | 1.1E+00 | 3.3E-05 | 2.2E+00  | 9.5E-02 | 1.7E+00  | 1.8E-05 | 2.4E+00  | 3.2E-06 | 4.2E+00 | 6.1E-07 | 4.0E+00  | 2.5E-11 | 4.8E+00 | 2.8E-13 | 4.7E+00 | 3.4E-03 |         |
| CDC45      | 2.1E+00 | 5.4E-07 | 2.8E+00  | 1.1E-20 | 6.3E+00 | 3.1E-02 | 5.4E+00  | 5.0E-03 | 1.4E+00 | 1.1E-06 | 2.6E+00  | 4.9E-02 | 2.3E+00  | 7.3E-09 | 3.8E+00  | 4.6E-05 | 3.2E+00 | 8.0E-09 | 3.8E+00  | 2.0E-08 | 5.0E+00 | 4.5E-14 | 4.9E+00 | 9.4E-03 |         |
| CDC6       | 2.0E+00 | 1.0E-05 | 2.6E+00  | 3.7E-11 | 5.7E+00 | 1.7E-02 | 4.4E+00  | 2.8E-03 | 1.4E+00 | 5.1E-08 | 1.5E+00  | 1.0E-01 | 2.1E+00  | 3.1E-03 | 3.8E+00  | 7.7E-05 | 3.1E+00 | 6.4E-07 | 3.6E+00  | 9.6E-13 | 4.3E+00 | 2.4E-10 | 3.4E+00 | 1.5E-02 |         |
| CDC7       | 1.8E+00 | 2.0E-04 | 1.9E+00  | 3.8E-12 | 3.1E+00 | 1.0E-01 | 2.8E+00  | 3.6E-03 | 1.1E+00 | 7.1E-05 | 1.7E-01  | 7.5E-01 | 5.4E-01  | 5.6E-05 | 1.2E+00  | 3.5     |         |         |          |         |         |         |         |         |         |

|            |         |         |         |         |         |         |          |         |          |          |          |         |          |         |         |         |         |         |         |         |         |         |         |         |
|------------|---------|---------|---------|---------|---------|---------|----------|---------|----------|----------|----------|---------|----------|---------|---------|---------|---------|---------|---------|---------|---------|---------|---------|---------|
| H2AFX      | 1.0E+00 | 1.3E-05 | 1.5E+00 | 1.5E-18 | 2.1E+00 | 2.0E-01 | 2.2E+00  | 6.0E-02 | 6.9E-01  | 1.9E+05  | 6.6E-01  | 8.6E-03 | 5.7E-01  | 7.0E-05 | 1.0E+00 | 8.2E-03 | 1.3E+00 | 1.1E+09 | 1.2E+00 | 5.2E-10 | 1.7E+00 | 1.9E-10 | 2.0E+00 | 4.4E-03 |
| HAU5S      | 9.5E-01 | 6.9E-03 | 2.7E-01 | 1.2E-02 | 1.2E+00 | 1.8E-01 | 1.1E+00  | 1.2E-03 | 1.1E+00  | 2.6E-09  | 2.8E-01  | 8.1E-02 | 3.7E-01  | 1.6E-05 | 4.7E-01 | 4.1E-04 | 8.6E-01 | 9.4E-11 | 6.9E-01 | 6.1E-06 | 1.3E+00 | 4.7E-06 | 1.0E-01 | 6.9E-01 |
| HAU5S      | 9.3E-01 | 2.7E-05 | 2.7E-01 | 3.7E-10 | 2.3E+00 | 1.2E-01 | 1.2E+00  | 9.3E-02 | 1.7E-01  | 8.8E-02  | 1.1E-01  | 2.2E-01 | 4.8E-01  | 1.3E-06 | 6.5E-01 | 6.8E-04 | 2.7E-01 | 3.6E-02 | 5.1E-01 | 3.5E-08 | 1.2E+00 | 2.7E-10 | 1.8E+00 | 2.2E-02 |
| HEATRI     | 7.7E-01 | 1.9E-04 | 4.3E-01 | 9.5E-08 | 2.3E-01 | 6.5E-01 | 1.8E+00  | 7.3E-04 | 1.0E+00  | 6.2E-09  | -1.9E-02 | 9.4E-01 | 2.9E-01  | 7.2E-06 | 6.5E-01 | 3.2E-04 | 1.0E+00 | 1.8E-07 | 1.1E+00 | 1.3E-17 | 1.4E+00 | 4.0E-01 | 1.6E-01 |         |
| HISTH12BF  | 2.5E+00 | 1.8E-02 | 2.2E+00 | 1.3E-07 | 1.6E+00 | 2.8E-01 | 3.0E+00  | 1.5E-02 | 6.8E-01  | 6.6E-02  | 1.3E-02  | 9.5E-01 | 1.1E+00  | 3.1E-02 | 7.1E-01 | 8.7E-02 | 1.3E+00 | 1.5E-03 | 1.3E+00 | 8.6E-07 | 1.5E+00 | 1.2E-06 | 7.4E-01 | 3.8E-01 |
| HISTH12BN  | 1.2E+00 | 2.0E-04 | 1.3E+00 | 1.0E-08 | 8.3E-02 | 9.2E-01 | 8.3E-01  | 2.9E-01 | 7.9E-01  | 7.3E-03  | 3.0E-02  | 9.1E-01 | 1.2E+00  | 8.8E-16 | 1.0E+00 | 7.7E-04 | 1.1E+00 | 8.6E-06 | 1.4E+00 | 1.6E-08 | 1.2E+00 | 5.9E-04 | 1.3E+00 | 3.5E-01 |
| HISTH2HAA3 | 1.7E+00 | 1.2E-03 | 2.7E+00 | 8.6E-12 | 3.5E-01 | 6.0E-01 | 1.4E+00  | 3.7E-02 | 3.9E-01  | 1.3E-01  | -7.7E-01 | 2.2E-02 | 1.1E+00  | 2.1E-05 | 1.3E+00 | 1.1E-01 | 2.1E+00 | 1.2E-02 | 1.7E+00 | 3.1E-09 | 1.4E+00 | 6.1E-05 | 8.9E-01 | 3.2E-01 |
| HISTH2H3C  | 2.0E+00 | 3.3E-04 | 2.2E+00 | 1.4E-07 | 2.1E+00 | 6.6E-02 | 2.2E+00  | 4.6E-02 | 6.7E-01  | 1.3E-02  | 9.7E-02  | 7.5E-01 | 3.7E-01  | 6.3E-01 | 3.3E-01 | 2.0E-01 | 2.2E+00 | 5.2E-05 | 1.3E+00 | 1.2E-04 | 1.5E+00 | 4.5E-08 | 1.1E+00 | 2.0E-01 |
| HISTH2H4A  | 1.4E+00 | 1.1E-03 | 2.2E+00 | 2.0E-07 | 4.9E-01 | 6.3E-01 | 2.5E+00  | 7.0E-02 | -3.9E-03 | 9.9E-01  | -1.7E+00 | 1.6E-03 | -5.7E-02 | 7.4E-01 | 7.8E-02 | 8.3E-01 | 2.2E+00 | 7.2E-07 | 1.4E+00 | 2.1E-07 | 1.5E+00 | 2.1E-05 | 2.8E-01 | 7.5E-01 |
| HUJRP      | 2.6E+00 | 2.1E-05 | 2.9E+00 | 1.0E-18 | 5.4E+00 | 2.1E-02 | 5.6E+00  | 1.0E-02 | 1.6E+00  | 1.3E+00  | 1.3E+00  | 8.8E-02 | 2.3E+00  | 1.6E-06 | 3.9E+00 | 2.3E-03 | 3.8E+00 | 2.0E+00 | 4.0E+00 | 3.8E+00 | 4.6E+00 | 3.2E+00 | 4.6E+00 | 1.7E-03 |
| HMB5       | 8.4E-01 | 2.8E-05 | 4.8E-01 | 1.8E-08 | 1.3E+00 | 3.2E-01 | 2.7E-02  | 9.2E-01 | 3.3E-01  | 1.9E-02  | 5.9E-01  | 3.1E-04 | -6.5E-02 | 4.1E-01 | 6.5E-01 | 5.8E-04 | 5.3E-01 | 1.2E-07 | 1.1E+00 | 1.6E-08 | 1.2E+00 | 4.9E-07 | 1.2E+00 | 1.1E-02 |
| HMG3B      | 2.2E+00 | 6.4E-04 | 2.2E+00 | 4.5E-18 | 2.3E+00 | 7.8E-03 | -5.4E-02 | 8.6E-01 | 1.0E+00  | 1.4E-04  | 1.5E+00  | 1.6E-07 | -6.1E-01 | 1.5E-05 | 1.4E+00 | 1.8E-05 | 5.5E-01 | 1.7E-02 | 3.2E+00 | 6.7E-10 | 2.3E+00 | 2.0E+00 | 2.7E+00 | 1.6E-03 |
| HSPD1      | 7.6E-01 | 8.9E-04 | 6.0E-01 | 2.7E-10 | 4.9E-02 | 8.6E-01 | -5.4E-01 | 4.4E-03 | 1.2E+00  | 2.0E+09  | 3.9E-01  | 5.7E-03 | -6.1E-02 | 5.1E-01 | 3.7E-01 | 1.7E-02 | 2.3E-01 | 9.1E-02 | 1.3E+00 | 8.7E-15 | 1.7E+00 | 3.9E+09 | 6.8E-01 | 9.0E-02 |
| HSPE1      | 8.6E-01 | 1.1E-04 | 9.7E-01 | 5.1E-17 | 1.2E+00 | 3.8E-01 | -5.4E-01 | 1.6E-03 | 8.1E-01  | 1.9E-04  | 2.8E-01  | 5.8E-02 | -2.8E-02 | 8.0E-01 | 5.2E-01 | 1.2E-03 | 2.6E-01 | 5.8E-02 | 1.1E+00 | 1.4E-14 | 1.5E+00 | 8.3E-10 | 1.4E+00 | 7.6E-05 |
| HERSL      | 1.6E+00 | 2.3E-04 | 1.1E+00 | 1.2E-16 | 5.5E-01 | 7.3E-01 | 5.9E-01  | 4.0E-01 | 1.7E+00  | 1.4E-04  | -1.9E+00 | 5.3E-07 | 6.9E-03  | 9.4E-01 | 9.8E-01 | 2.9E-02 | 3.1E-01 | 4.8E-01 | 1.6E+00 | 8.1E-09 | 1.2E+00 | 4.0E-06 | 9.2E-01 | 4.3E-02 |
| ILF2       | 8.3E-01 | 9.9E-05 | 8.3E-01 | 1.1E-16 | 6.8E-01 | 4.1E-02 | 1.8E+00  | 4.8E-04 | 5.3E-01  | 7.8E-06  | -9.3E-01 | 1.1E-07 | -2.0E-01 | 1.9E-04 | 2.0E-02 | 8.5E-01 | 1.1E+00 | 4.9E-10 | 1.2E+00 | 1.1E-11 | 1.2E+00 | 9.8E-11 | 1.1E+00 | 3.1E-02 |
| INCENP     | 1.4E+00 | 3.7E-04 | 8.4E-01 | 2.9E-14 | 2.1E+00 | 2.0E-01 | 2.0E+00  | 2.0E-03 | 8.1E-01  | 1.6E-06  | 7.3E-01  | 1.5E-02 | 2.3E-01  | 1.5E-03 | 2.7E-01 | 4.8E-02 | 1.5E+00 | 8.6E-09 | 1.4E+00 | 6.7E-11 | 1.9E+00 | 1.5E-12 | 2.1E+00 | 1.1E-02 |
| INTS8      | 7.1E-01 | 2.0E-05 | 8.0E-01 | 1.8E-16 | 6.4E-01 | 5.3E-01 | 1.2E+00  | 1.3E-05 | 7.6E-01  | 2.7E-07  | 6.6E-01  | 3.7E-03 | 7.1E-01  | 5.6E-16 | 5.7E-01 | 1.2E-05 | 9.5E-01 | 1.2E-07 | 1.0E+00 | 4.9E-14 | 1.2E+00 | 2.1E-13 | 1.0E+00 | 4.1E-02 |
| KATZ2A     | 1.1E+00 | 8.5E-06 | 4.9E-02 | 5.6E-01 | 3.2E-01 | 3.0E-01 | 1.6E+00  | 1.1E-03 | 1.4E-12  | -6.0E-01 | 3.8E-03  | 3.7E-01 | 9.9E-05  | 7.8E-01 | 3.6E-03 | 1.1E+00 | 1.7E-11 | 1.2E+00 | 1.8E-15 | 1.4E+00 | 4.2E-12 | 2.0E-01 | 7.5E-01 |         |
| KIF11      | 1.8E+00 | 1.7E-05 | 2.4E+00 | 2.1E-21 | 5.0E+00 | 8.9E-02 | 3.6E+00  | 2.2E-03 | 1.1E+00  | 1.2E-05  | 6.1E-01  | 3.5E-01 | 1.1E+00  | 2.0E-07 | 1.4E+00 | 2.1E-03 | 2.3E+00 | 1.3E-07 | 3.2E+00 | 5.8E-11 | 3.9E+00 | 1.2E-14 | 3.2E+00 | 4.2E-04 |
| KIF18A     | 2.2E+00 | 1.6E-05 | 2.4E+00 | 7.2E-22 | 5.2E+00 | 9.3E-02 | 5.0E+00  | 1.8E-03 | 1.5E+00  | 3.2E-09  | 1.7E+00  | 1.2E+00 | 1.8E+00  | 5.0E-12 | 2.2E+00 | 1.8E-03 | 3.6E+00 | 7.9E-07 | 1.6E+00 | 8.3E-10 | 2.5E+00 | 1.7E-13 | 3.5E+00 | 3.8E-03 |
| KIF20A     | 2.1E+00 | 4.2E-06 | 3.1E+00 | 7.0E-22 | 5.7E+00 | 1.1E-01 | 5.0E+00  | 3.4E-03 | 1.6E+00  | 6.4E-08  | 2.7E+00  | 5.4E-02 | 2.7E+00  | 1.5E-06 | 3.9E+00 | 3.9E-04 | 4.0E+00 | 1.6E-08 | 3.6E+00 | 5.7E-14 | 4.0E+00 | 4.4E-12 | 4.0E+00 | 3.1E-03 |
| KIF23      | 2.2E+00 | 6.3E-04 | 2.2E+00 | 4.5E-19 | 3.5E+00 | 7.2E-02 | 5.2E+00  | 3.0E-03 | 1.4E+00  | 4.6E-08  | 8.0E-01  | 3.3E-01 | 5.9E-01  | 7.7E-03 | 7.7E-01 | 2.2E-02 | 3.7E+00 | 2.9E-07 | 3.0E+00 | 1.4E-11 | 3.9E+00 | 6.7E-17 | 2.7E+00 | 9.7E-03 |
| KIF2C      | 1.3E+00 | 1.1E-03 | 1.5E+00 | 2.5E-12 | 1.1E+00 | 2.0E-02 | 1.9E+00  | 2.9E-04 | 9.3E-01  | 3.3E-04  | 1.3E+00  | 2.4E-04 | 3.3E-01  | 8.9E-03 | 8.8E-01 | 3.0E-03 | 1.7E+00 | 9.2E-07 | 1.1E+00 | 7.9E-06 | 1.4E+00 | 2.9E-05 | 2.2E+00 | 1.1E-01 |
| LIG1       | 1.2E+00 | 4.9E-09 | 8.2E-01 | 1.6E-14 | 2.4E+00 | 1.3E-01 | 1.3E+00  | 7.0E-04 | 8.1E-01  | 8.9E-06  | 9.6E-02  | 6.6E-01 | 9.4E-01  | 2.0E-14 | 8.8E-01 | 6.7E-08 | 1.0E+00 | 6.6E-08 | 7.9E-01 | 1.3E-09 | 1.7E+00 | 1.4E-06 | 7.3E-01 | 4.9E-02 |
| LIN9       | 1.3E+00 | 1.6E-04 | 9.9E-01 | 2.1E-14 | 2.0E+00 | 2.0E-01 | 2.6E+00  | 1.4E-04 | 7.1E-01  | 7.7E-05  | -1.9E-01 | 3.7E-01 | 1.7E-01  | 3.8E-02 | 3.0E-01 | 5.1E-02 | 1.7E+00 | 5.1E-07 | 7.6E-01 | 1.4E-06 | 1.3E+00 | 8.3E-09 | 1.1E+00 | 1.2E-02 |
| LSM2       | 8.3E-01 | 1.1E-03 | 4.0E-01 | 2.5E-10 | 8.3E-01 | 3.3E-01 | 1.4E+00  | 4.8E-03 | 4.7E-01  | 6.1E-03  | -9.3E-01 | 1.8E-04 | 2.0E-01  | 2.5E-03 | 2.5E-01 | 7.1E-02 | 7.5E-01 | 3.0E-05 | 7.4E-01 | 5.9E-08 | 8.4E-01 | 1.6E-06 | 9.6E-01 | 1.3E-02 |
| LSM4       | 7.8E-01 | 8.4E-06 | 1.1E+00 | 4.9E-24 | 1.7E+00 | 1.8E-01 | 8.8E-01  | 9.3E-02 | 4.9E-01  | 1.6E-05  | 4.8E-01  | 3.5E-03 | 4.1E-01  | 1.7E-07 | 2.2E-01 | 4.6E-02 | 9.3E-01 | 7.9E-07 | 5.5E-01 | 3.3E-05 | 1.1E+00 | 1.2E-07 | 1.3E+00 | 1.5E-02 |
| LSM7       | 6.8E-01 | 1.7E-04 | 5.6E-01 | 4.4E-08 | 1.5E+00 | 3.5E-01 | 9.0E-01  | 1.7E-02 | 6.8E-01  | 2.4E-06  | 2.4E-01  | 9.4E-02 | 5.1E-01  | 1.3E-04 | 4.8E-01 | 1.4E-03 | 5.0E-01 | 1.7E-03 | 5.0E-01 | 4.9E-04 | 8.9E-01 | 1.1E-06 | 6.7E-01 | 2.9E-02 |
| MAD2L2     | 1.2E+00 | 4.2E-03 | 6.4E-01 | 1.0E-10 | 3.0E-01 | 4.8E-01 | -2.2E-01 | 5.1E-01 | 6.0E-01  | 2.2E-06  | 1.2E+00  | 9.2E-05 | 8.9E-03  | 9.0E-01 | 1.3E-01 | 3.9E-01 | 3.0E-01 | 6.4E-02 | 9.9E-01 | 9.5E-01 | 1.1E+00 | 1.5E+00 | 1.5E+00 | 2.2E-02 |
| MARS       | 6.9E-01 | 7.3E-04 | 6.2E-01 | 6.2E-20 | 9.9E-01 | 8.1E-02 | 8.2E-01  | 7.2E-04 | 7.4E-01  | 1.4E-07  | 9.0E-01  | 3.7E-05 | -1.8E-01 | 3.6E-03 | 4.4E-01 | 6.2E-05 | 8.0E-01 | 1.9E-09 | 8.6E-01 | 3.5E-10 | 8.3E-01 | 1.0E+00 | 1.0E+00 | 8.4E-03 |
| MASTL      | 9.4E-01 | 2.3E-03 | 6.9E-01 | 3.0E-12 | 1.8E+00 | 1.3E-01 | 1.2E+00  | 2.1E-04 | 8.0E-01  | 1.5E-07  | -3.8E-01 | 1.6E-02 | 2.9E-01  | 6.2E-05 | 3.1E-01 | 3.9E-03 | 6.4E-01 | 2.8E-06 | 7.7E-01 | 9.9E-06 | 1.5E+00 | 8.0E-08 | 1.3E+00 | 7.1E-03 |
| MCM2       | 2.1E+00 | 8.8E-05 | 1.5E+00 | 1.6E-17 | 3.2E+00 | 3.4E-02 | 3.0E+00  | 5.8E-04 | 1.2E+00  | 2.5E-07  | 1.2E+00  | 4.7E-02 | 6.2E-01  | 2.6E-06 | 1.3E+00 | 1.0E-05 | 2.4E+00 | 1.1E-07 | 2.2E+00 | 1.8E-08 | 3.5E+00 | 5.3E-13 | 8.8E+00 | 1.2E-02 |
| MCM3       | 6.7E-01 | 8.7E-04 | 6.8E-01 | 2.6E-13 | 1.4E+00 | 4.8E-02 | 2.5E+00  | 3.2E-07 | 9.7E-01  | 8.1E-09  | -7.1E-01 | 2.1E-03 | 4.1E-01  | 7.2E-02 | 5.5E-01 | 6.3E-03 | 1.4E+00 | 3.2E-09 | 8.6E-01 | 5.4E-09 | 1.4E+00 | 2.1E-09 | 8.1E+00 | 2.4E-02 |
| MCM4       | 1.6E+00 | 1.7E-05 | 1.7E+00 | 4.2E-16 | 4.0E+00 | 1.5E-01 | 2.0E+00  | 8.0E-04 | 1.1E+00  | 8.4E-06  | 4.7E-01  | 1.2E-01 | -3.0E-01 | 1.8E-04 | 5.5E-01 | 4.5E-02 | 1.5E+00 | 9.3E-07 | 2.4E+00 | 1.8E-11 | 3.2E+00 | 1.6E-14 | 2.2E+00 | 4.5E-02 |
| MCM5       | 8.7E-01 | 6.4E-03 | 4.5E-01 | 6.8E-06 | 2.3E+00 | 2.6E-02 | 1.6E+00  | 5.5E-03 | 5.7E-01  | 8.7E-04  | 1.1E-01  | 6.6E-01 | 1.1E+00  | 3.9E-18 | 8.2E-01 | 1.8E-05 | 1.4E+00 | 2.3E-07 | 8.8E-01 | 7.4E-05 | 1.8E+00 | 3.9E-09 | 3.6E-01 | 2.7E-01 |
| MCM6       | 1.1E+00 | 3.7E-04 | 1.1E+00 | 1.7E-17 | 1.5E+00 | 9.2E-03 | 2.2E+00  | 5.5E-05 | 8.9E-01  | 2.2E-06  | -1.2E-01 | 5.4E-01 | 4.4E-01  | 1.4E-08 | 7.7E-01 | 5.1E-03 | 1.8E+00 | 8.8E-08 | 1.6E+00 | 1.9E-12 | 2.0E+00 | 5.0E-10 | 1.1E+00 | 2.7E-02 |
| MCM7       | 1.1E+00 | 2.1E-03 | 4.8E-01 | 7.5E-06 | 1.9E+00 | 1.1E-01 | 1.8E+00  | 4.2E-04 | 1.2E+00  | 2.2E-08  | 4.1E-01  | 1.9E-01 | 9.7E-01  | 4.1E-15 | 1.0E+00 | 3.1E-06 | 1.2E+00 | 9.8E-11 | 1.3E+00 | 4.7E-09 | 2.1E+00 | 5.8E-13 | 9.1E-01 | 1.7E-02 |
| MCCS3      | 5.1E-01 | 1.6E-02 | 6.9E-01 | 4.1E-09 | 2.6E-01 | 6.4E-01 | 4.6E-01  | 2.7E-02 | 1.1E+00  | 8.2E-05  | 4.8E-01  | 6.3E-04 | 3.3E-01  | 2.9E-09 | 7.6E-01 | 9.6E-07 | 1.6E-01 | 6.8E-02 | 5.2E-01 | 4.5E-08 | 8.2E-01 | 5.0E-02 | 2.3E-01 | 4.1E-01 |
| MRP12      | 6.9E-01 | 3.9E-06 | 7.5E-01 | 2.5E-09 | 1.6E+00 | 2.7E-01 | -7.0E-01 | 1.7E-03 | -6.0E-02 | 6.7E-01  | 6.1E-01  | 1.5E-03 | -1.2E-01 | 1.6E-01 | 6.4E-01 | 4.9E-03 | 2.5E-01 | 7.5E-02 | 1.2E+00 | 4.0E-13 | 1.4E+00 | 2.6E-09 | 1.5E+00 | 2.4E-02 |
| MRPL17     | 6.4E-01 | 2.1E-04 | 7.7E-01 | 5.3E-23 | 1.4E+00 | 1.2E-01 | 8.7E-01  | 5.8E-04 | 8.1E-01  | 2.1E-06  | 2.5E-02  | 8.4E-01 | 5.2E-01  | 8.8E-08 | 5.1E-01 | 7.3E-04 | 3.5E-01 | 1.8E-05 | 7.9E-01 | 2.0E-11 | 6.0E-01 | 1.7E-05 | 7.8E-01 | 6.6E-02 |
| MRPL9      | 5.2E-01 | 5.9E-05 | 5.7E-01 | 1.1E-12 | 5.4E    |         |          |         |          |          |          |         |          |         |         |         |         |         |         |         |         |         |         |         |

|          |          |         |          |         |          |         |          |          |         |         |          |         |          |         |          |         |          |         |          |         |          |         |          |         |         |
|----------|----------|---------|----------|---------|----------|---------|----------|----------|---------|---------|----------|---------|----------|---------|----------|---------|----------|---------|----------|---------|----------|---------|----------|---------|---------|
| RFC3     | 1.2E+00  | 8.5E-04 | 7.2E-01  | 3.3E-10 | 1.5E+00  | 1.3E-01 | 1.0E+00  | 8.2E-02  | 1.8E+00 | 4.6E-09 | -7.3E-01 | 4.4E-03 | -1.0E-01 | 1.8E-01 | 2.2E-01  | 2.1E-01 | 1.2E+00  | 2.7E-06 | 9.3E-01  | 1.2E-08 | 1.5E+00  | 1.8E-08 | 1.1E+00  | 2.8E-02 |         |
| RFC4     | 1.5E+00  | 3.8E-04 | 9.8E-01  | 1.4E-10 | 2.0E+00  | 1.1E-01 | 2.0E+00  | 9.7E-05  | 1.0E+00 | 3.5E-08 | 3.2E-01  | 2.5E-01 | 9.0E-01  | 5.1E-12 | 1.0E+00  | 1.2E-06 | 1.6E+00  | 2.2E-10 | 1.8E+00  | 1.7E-09 | 3.4E+00  | 5.9E-11 | 1.5E+00  | 8.6E-02 |         |
| RF5      | 1.3E+00  | 9.4E-07 | 6.3E-01  | 9.2E-12 | 2.1E+00  | 1.8E-01 | 6.7E-01  | 1.0E-02  | 7.6E-01 | 7.6E-05 | -4.6E-01 | 2.3E-03 | 2.1E-01  | 7.2E-04 | 6.4E-01  | 4.9E-04 | 4.7E-01  | 8.2E-04 | 1.1E+00  | 2.1E-07 | 1.8E+00  | 5.6E-12 | 3.0E-01  | 3.3E-01 |         |
| RFWFD3   | 1.3E+00  | 2.0E-05 | 5.4E-01  | 4.3E-10 | 1.4E+00  | 2.6E-01 | 1.8E+00  | 5.6E-05  | 1.1E+00 | 2.7E-10 | -6.9E-01 | 5.1E-07 | -3.9E-01 | 2.6E-10 | 3.3E-01  | 2.0E-02 | 5.3E-01  | 4.3E-06 | 1.1E+00  | 1.2E-14 | 1.5E+00  | 7.6E-10 | 8.3E-01  | 5.0E-02 |         |
| RNASEH2A | 2.0E+00  | 3.6E-02 | 1.6E-01  | 3.4E-20 | 3.5E+00  | 1.0E-01 | 2.0E+00  | 1.6E-02  | 1.2E+00 | 3.9E-10 | 5.7E-01  | 1.5E-01 | 9.0E-01  | 1.5E-09 | 1.2E+00  | 8.6E-06 | 1.7E+00  | 4.3E-08 | 1.4E+00  | 7.8E-08 | 2.1E+00  | 4.8E-14 | 1.8E+00  | 7.9E-03 |         |
| RPL8     | 1.0E-01  | 5.3E-01 | 1.6E-01  | 7.3E-02 | 3.1E-03  | 9.9E-01 | 1.1E+00  | 1.2E-02  | 7.3E-01 | 9.9E-04 | 9.5E-01  | 7.4E-04 | 6.5E-01  | 3.3E-07 | 5.6E-01  | 2.5E-04 | 9.0E-01  | 2.6E-03 | 6.0E-01  | 1.6E-05 | 6.8E-01  | 7.9E-05 | -4.5E-02 | 9.1E-01 |         |
| RPN2     | 7.5E-01  | 7.2E-05 | 8.5E-01  | 1.8E-18 | 8.3E-01  | 2.4E-01 | 4.7E-01  | 3.0E-02  | 1.0E+00 | 3.4E-06 | 2.9E-01  | 2.7E-04 | 3.6E-01  | 6.0E-07 | 3.1E-01  | 1.5E-02 | 5.9E-01  | 1.0E-08 | 7.3E-01  | 3.3E-14 | 8.3E-01  | 1.1E-08 | 1.4E+00  | 5.3E-02 |         |
| RPP21    | 7.4E-01  | 6.1E-03 | 5.5E-01  | 1.9E-09 | 1.1E+00  | 2.0E-01 | 1.1E+00  | 4.6E-03  | 2.6E-01 | 4.7E-02 | -2.9E-01 | 2.6E-02 | 5.2E-01  | 2.7E-06 | 4.3E-01  | 9.6E-03 | 5.8E-01  | 3.8E-04 | 7.4E-01  | 6.3E-11 | 8.9E-01  | 7.6E-08 | 6.8E-01  | 1.4E-01 |         |
| RPP40    | 9.1E-01  | 6.9E-04 | 6.5E-01  | 3.9E-09 | 1.2E+00  | 2.3E-01 | -7.3E-02 | 7.7E-01  | 1.1E+00 | 7.0E-06 | -4.7E-01 | 2.3E-01 | 2.3E-01  | 7.2E-03 | 5.7E-01  | 4.9E-04 | 7.4E-01  | 1.1E-04 | 1.7E+00  | 8.1E-15 | 1.9E+00  | 7.8E-10 | 1.1E+00  | 1.1E-03 |         |
| RPS19    | 3.6E-01  | 7.3E-02 | -6.9E-02 | 5.4E-01 | 1.1E+00  | 4.2E-01 | 1.2E+00  | 3.7E-03  | 6.1E-01 | 1.8E-04 | 0.4E-01  | 4.9E-03 | 1.4E+00  | 6.5E-13 | 1.5E+00  | 4.1E-05 | 4.5E-01  | 3.7E-02 | 4.9E-01  | 3.2E-04 | 7.8E-01  | 1.3E+00 | 3.0E-01  | 2.8E-01 |         |
| RPS2     | -7.4E-02 | 6.6E-01 | 2.2E-01  | 1.2E-02 | 3.5E-01  | 5.4E-01 | 1.3E+00  | 6.1E-03  | 7.3E-01 | 1.3E-07 | 1.4E+00  | 1.9E-05 | 1.4E+00  | 1.6E-12 | 1.4E+00  | 1.9E-06 | 4.9E-01  | 3.3E-03 | 6.5E-01  | 2.2E-09 | 8.0E-01  | 3.2E-09 | 3.0E-01  | 3.3E-01 |         |
| RPM2     | 1.5E+00  | 4.7E-04 | 3.4E+00  | 7.0E-13 | 6.3E+00  | 1.3E-01 | 4.0E+00  | 2.9E-03  | 1.3E+00 | 7.2E-06 | 1.8E+00  | 2.0E-01 | 2.2E+00  | 1.2E-08 | 3.6E+00  | 1.1E-03 | 3.0E+00  | 9.0E-10 | 3.4E+00  | 2.0E-10 | 4.1E+00  | 8.6E-14 | 4.2E+00  | 9.6E-03 |         |
| RRP1     | 6.8E-01  | 5.5E-03 | 4.4E-01  | 2.4E-06 | 1.3E+00  | 1.4E-01 | 3.0E-01  | 8.3E-02  | 9.5E-01 | 3.2E-10 | 1.6E-01  | 2.0E-01 | 6.2E-01  | 5.5E-10 | 3.4E-01  | 1.4E-02 | 4.9E-01  | 5.3E-05 | 7.1E-01  | 9.6E-11 | 9.9E-01  | 6.5E-11 | 7.6E-01  | 9.1E-03 |         |
| RRS1     | 1.2E-01  | 5.0E-01 | 8.1E-01  | 1.7E-11 | -3.4E-01 | 4.4E-01 | 1.2E+00  | 5.0E-05  | 1.2E+00 | 2.1E-08 | 9.3E-01  | 1.1E-04 | 2.9E-01  | 4.2E-03 | 6.6E-01  | 6.1E-04 | 9.2E-01  | 1.5E-05 | 9.3E-01  | 2.0E-06 | 8.3E-01  | 6.1E-06 | 2.8E-01  | 1.5E-01 |         |
| RTEL1    | 6.7E-01  | 2.3E-03 | 2.3E-01  | 5.7E-03 | 1.0E+00  | 4.8E-01 | 1.0E+00  | 5.5E-04  | 1.0E+00 | 4.4E-03 | 3.0E-01  | 8.4E-02 | 9.9E-01  | 9.1E-17 | 6.4E-01  | 1.3E-04 | 9.1E-01  | 4.1E-10 | 7.2E-01  | 3.2E-08 | 4.8E-01  | 9.4E-04 | 2.7E-01  | 3.1E-01 |         |
| RUNX1    | 4.7E-01  | 7.2E-02 | 2.5E-01  | 3.1E-03 | 2.4E+00  | 8.8E-02 | 1.6E+00  | 2.4E-03  | 1.3E+00 | 1.0E-07 | 8.2E-01  | 1.2E-02 | 1.7E+00  | 9.1E-11 | 1.5E+00  | 8.3E-03 | 1.8E-01  | 3.6E-01 | 5.8E-01  | 2.9E-08 | 2.9E-01  | 1.6E-02 | 1.2E+00  | 3.1E-01 |         |
| RUVBL1   | 1.3E+00  | 9.6E-04 | 8.3E-01  | 6.9E-18 | 4.9E-01  | 1.3E-01 | 1.4E+00  | 1.8E-03  | 1.2E+00 | 1.3E-09 | -9.4E-02 | 4.8E-01 | -2.5E-01 | 6.7E-05 | 2.8E-01  | 1.9E-02 | 6.3E-01  | 4.4E-08 | 8.5E-01  | 2.5E-07 | 1.6E+00  | 1.5E-12 | 3.5E-01  | 3.9E-01 |         |
| RUVBL2   | 7.0E-01  | 8.9E-04 | 7.3E-01  | 4.2E-13 | 1.1E+00  | 1.6E-01 | 4.5E-01  | 2.0E-02  | 6.5E-01 | 6.4E-07 | 2.1E-01  | 5.5E-02 | 4.7E-01  | 8.1E-06 | 6.1E-01  | 1.4E-05 | 5.7E-01  | 3.4E-06 | 3.7E-01  | 5.3E-04 | 9.5E-01  | 2.1E-07 | 7.6E-02  | 8.4E-01 |         |
| SCD      | 2.4E+00  | 5.7E-03 | -1.3E+00 | 1.6E-03 | 3.1E+00  | 3.4E-01 | -3.8E+00 | 2.2E-02  | 1.7E+00 | 7.4E-06 | 4.0E+00  | 1.9E-05 | 3.1E+00  | 4.2E-16 | 2.1E+00  | 1.1E-05 | 3.6E-01  | 2.2E-01 | -8.4E-01 | 3.4E-09 | -9.3E-03 | 9.6E-01 | 1.9E+00  | 1.1E-01 |         |
| SEC61A1  | 9.0E-01  | 9.3E-04 | 5.7E-01  | 9.5E-18 | 2.7E-01  | 6.9E-01 | 4.2E-01  | 8.0E-03  | 6.2E-01 | 3.4E-04 | 8.3E-01  | 1.1E-07 | 3.8E-01  | 4.3E-07 | 5.4E-01  | 1.6E-04 | 5.2E-01  | 3.6E-05 | 7.6E-01  | 3.9E-14 | 7.0E-01  | 3.8E-09 | 7.7E-01  | 1.2E-02 |         |
| SF3A2    | 6.0E-01  | 1.8E-04 | 8.5E-02  | 2.3E-01 | 3.1E-02  | 9.2E-01 | 1.3E-01  | 1.1E-03  | 4.3E-01 | 1.3E-07 | 4.7E-01  | 4.7E-04 | 7.7E-01  | 3.3E-10 | 6.0E-01  | 4.4E-04 | 8.8E-01  | 2.4E-06 | 1.0E-01  | 2.5E-01 | 6.3E-01  | 1.7E-06 | -1.6E-01 | 4.9E-01 |         |
| SFHM1    | 9.2E-01  | 2.5E-03 | 6.1E-01  | 4.3E-11 | 9.1E-01  | 5.1E-01 | 1.1E+00  | -9.8E-02 | 6.8E-01 | 6.8E-01 | 3.5E-05  | 1.4E+00 | 2.8E-10  | 9.0E-01 | 7.2E-08  | 9.5E-01 | 4.0E-05  | 3.8E-01 | 1.0E-02  | 9.3E-01 | 3.2E-14  | 1.6E+00 | 3.6E-08  | 9.8E-01 | 8.1E-03 |
| SHMT2    | 1.2E+00  | 8.8E-07 | 8.1E-01  | 2.4E-13 | 1.9E+00  | 1.3E-01 | 1.6E+00  | 5.3E-06  | 1.3E+00 | 7.0E-09 | 1.3E+00  | 1.4E-03 | 2.1E+00  | 5.7E-21 | 1.0E+00  | 3.7E-05 | -4.8E-01 | 8.8E-07 | 1.4E+00  | 8.4E-13 | 1.8E+00  | 7.1E-11 | 1.0E+00  | 5.1E-03 |         |
| SKA1     | 1.9E+00  | 2.9E-05 | 3.0E+00  | 7.5E-17 | 5.6E+00  | 8.7E-02 | 5.1E+00  | 1.8E-02  | 1.0E+00 | 2.4E-04 | 1.6E+00  | 4.7E-02 | 1.9E+00  | 3.6E-08 | 2.6E+00  | 3.5E-04 | 4.1E+00  | 1.8E-07 | 3.3E+00  | 7.7E-09 | 4.4E+00  | 8.9E-17 | 3.9E+00  | 9.8E-03 |         |
| SKA3     | 1.9E+00  | 2.2E-05 | 2.6E+00  | 8.3E-23 | 5.9E+00  | 5.2E-02 | 4.7E+00  | 7.2E-03  | 1.9E+00 | 9.0E-11 | 2.9E+00  | 5.8E-02 | 2.1E+00  | 4.5E-10 | 2.5E+00  | 2.6E-04 | 3.4E+00  | 7.1E-08 | 3.3E+00  | 1.3E-12 | 4.1E+00  | 7.5E-15 | 4.0E+00  | 1.7E-04 |         |
| SLC38A5  | 7.6E-01  | 1.8E-01 | 1.9E+00  | 9.5E-11 | 2.6E+00  | 9.8E-02 | 3.6E+00  | 1.2E-01  | 1.9E+00 | 1.0E-05 | -3.4E+00 | 1.9E-08 | 2.2E+00  | 9.9E-02 | 5.9E-01  | 3.6E-01 | 1.1E+00  | 1.8E-01 | -2.2E-01 | 1.7E-01 | 6.1E-01  | 1.1E-01 | -3.5E-01 | 6.5E-01 |         |
| SLC4A5   | 5.8E-01  | 2.5E-02 | 8.6E-01  | 1.0E-15 | 6.3E-01  | 3.4E-01 | 2.3E+00  | 9.4E-03  | 9.6E-01 | 1.1E-04 | 4.2E+00  | 1.4E-05 | 7.4E-01  | 1.0E-07 | 7.4E-01  | 6.3E-02 | 4.9E-01  | 7.5E-02 | -1.0E-01 | 5.7E-01 | 2.8E-01  | 9.0E-02 | 8.4E-01  | 3.8E-02 |         |
| SMARCA4  | 7.9E-01  | 8.1E-05 | 8.8E-01  | 4.5E-12 | 9.9E-01  | 6.0E-02 | 2.0E+00  | 5.7E-05  | 7.1E-01 | 5.4E-07 | 3.2E-01  | 1.8E-03 | 2.8E-01  | 7.6E-05 | 1.0E+00  | 9.9E-02 | 2.1E-01  | 1.0E+00 | 8.2E-10  | 4.5E-01 | 6.4E-05  | 7.2E-01 | 5.6E-06  | 1.1E-01 | 1.0E-02 |
| SMC2     | 1.2E+00  | 5.7E-04 | 5.9E-01  | 6.8E-10 | 2.3E+00  | 2.2E-01 | 1.5E+00  | 7.5E-03  | 7.7E-01 | 1.2E-04 | 2.2E-01  | 3.5E-01 | -1.2E-01 | 1.1E-01 | -2.1E-01 | 1.7E-01 | 1.1E+00  | 2.5E-08 | 7.9E-01  | 3.6E-05 | 1.8E+00  | 2.4E-11 | 1.3E+00  | 1.5E-01 |         |
| SMC4     | 1.2E+00  | 2.8E-04 | 1.5E+00  | 8.3E-21 | 3.1E+00  | 2.1E-01 | 2.0E+00  | 7.5E-03  | 7.8E-01 | 1.3E-06 | 1.1E+00  | 1.4E-02 | 1.5E-01  | 1.1E-08 | 5.8E-01  | 1.7E-02 | 1.3E+00  | 9.7E-08 | 6.2E-01  | 2.6E-04 | 1.7E+00  | 1.6E-12 | 2.0E+00  | 2.8E-03 |         |
| SMG7     | 8.7E-01  | 1.5E-05 | 7.5E-01  | 8.5E-25 | 4.5E-01  | 1.5E-01 | 1.3E+00  | 1.1E-03  | 4.3E-01 | 1.1E-03 | 4.2E-01  | 3.5E-02 | 1.1E-01  | 1.0E-02 | 2.2E-01  | 9.6E-02 | 7.4E-01  | 3.5E-08 | 5.8E-01  | 1.3E-11 | 7.8E-01  | 3.7E-12 | 6.0E-01  | 2.2E-02 |         |
| SNRPB    | 9.7E-01  | 3.3E-05 | 8.6E-01  | 4.7E-20 | 1.3E+00  | 1.9E-02 | 1.6E+00  | 7.8E-04  | 1.0E+00 | 1.4E-05 | 8.4E-01  | 3.2E-06 | 5.7E-01  | 5.3E-08 | 1.0E+00  | 2.5E-06 | 1.0E+00  | 1.2E-09 | 6.8E-01  | 1.6E-06 | 1.3E+00  | 7.1E-11 | 1.0E+00  | 5.1E-03 |         |
| SNRPD1   | 8.1E-01  | 4.8E-06 | 7.3E-01  | 3.1E-18 | 1.1E+00  | 7.5E-02 | 1.5E+00  | 1.7E-04  | 4.8E-01 | 1.1E-02 | 1.5E-01  | 2.9E-02 | 3.2E-01  | 2.5E-07 | 2.4E-01  | 2.9E-02 | 6.5E-01  | 5.0E-08 | 8.5E-01  | 1.2E-09 | 1.4E+00  | 3.9E-08 | 1.1E+00  | 6.1E-03 |         |
| SNRPD2   | 3.8E-01  | 1.2E-02 | 3.4E-01  | 7.4E-06 | 7.8E-01  | 4.7E-01 | 1.1E+00  | 9.1E-03  | 6.1E-01 | 3.4E-04 | 2.4E-01  | 8.7E-01 | 5.2E-01  | 1.3E-06 | 5.6E-01  | 1.8E-04 | 7.3E-01  | 1.1E-04 | 6.1E-03  | 9.3E-07 | 9.4E-01  | 2.1E-08 | 4.0E-01  | 8.8E-02 |         |
| SNRPE    | 6.8E-01  | 1.7E-05 | 9.7E-01  | 6.4E-19 | 1.2E+00  | 4.5E-01 | 1.6E+00  | 6.5E-04  | 6.6E-01 | 1.2E-05 | -1.7E-01 | 1.6E-01 | 4.4E-01  | 5.9E-07 | 3.0E-01  | 3.8E-02 | 1.1E+00  | 1.9E-07 | 1.1E+00  | 2.4E-13 | 1.3E+00  | 1.2E-10 | 7.4E-01  | 5.6E-03 |         |
| SNRPF    | 9.9E-01  | 6.9E-05 | 9.7E-01  | 7.1E-16 | 1.3E+00  | 1.1E-01 | 4.3E-01  | 2.3E-01  | 7.4E-01 | 6.3E-06 | 4.2E-01  | 1.5E-04 | 5.0E-01  | 1.9E-06 | 7.2E-01  | 5.1E-06 | 1.8E-01  | 5.3E-02 | 6.5E-01  | 6.5E-07 | 1.1E+00  | 1.4E-08 | 1.2E+00  | 1.1E-02 |         |
| SNX12    | 9.5E-01  | 7.2E-02 | 1.5E+00  | 6.9E-18 | -4.3E-01 | 6.8E-01 | 1.9E+00  | 3.9E-04  | 1.3E-01 | 3.1E-03 | 8.7E-01  | 2.9E-04 | 4.2E-01  | 1.1E-04 | 6.2E-01  | 2.4E-03 | 1.4E+00  | 1.9E-05 | 1.2E+00  | 4.9E-08 | 1.9E+00  | 2.7E-07 | 1.4E+00  | 2.5E-02 |         |
| SPAG5    | 2.2E+00  | 2.0E-06 | 2.7E+00  | 1.4E-19 | 3.9E+00  | 9.1E-03 | 1.1E+00  | 2.7E-02  | 8.9E-01 | 3.0E-05 | -1.3E+00 | 3.7E-02 | -4.5E-01 | 5.8E-02 | -1.9E+00 | 3.2E-05 | 1.1E+00  | 1.0E-04 | 3.4E+00  | 1.7E-09 | 3.8E+00  | 3.3E-12 | 3.7E+00  | 3.1E-02 |         |
| SPATS2   | 7.1E-01  | 2.5E-04 | 7.4E-01  | 7.4E-20 | 3.7E-01  | 2.0E-01 | 2.9E+00  | 1.1E-04  | 5.2E-01 | 7.2E-08 | 4.4E-01  | 7.6E-03 | 2.8E-01  | 1.0E-05 | 4.5E-01  | 2.6E-04 | 1.6E+00  | 1.6E-11 | 1.2E+00  | 1.1E-12 | 1.3E+00  | 1.1E-15 | 1.5E+00  | 8.7E-02 |         |
| SPC24    | 1.4E+00  | 9.6E-03 | 2.8E+00  | 1.3E-15 | 4.0E+00  | 7.7E-02 | 3.5E+00  | 6.2E-03  | 9.2E-01 | 1.1E-05 | 2.0E+00  | 8.2E-02 | 1.7E+00  | 8.3E-10 | 2.6E+00  | 8.4E-05 | 3.4E+00  | 2.9E-07 | 3.0E+00  | 3.0E-10 | 3.0E+00  | 1.1E-11 | 3.4E+00  | 3.3E-02 |         |
| SPC25    | 1.9E+00  | 1.5E-04 | 2.9E+00  | 2.1E-26 | 4.8E+00  | 1.2E-03 | 4.6E+00  | 2.3E-02  | 1.2E+00 | 2.9E-08 | 1.4E+00  | 8.1E-02 | 1.9E+00  | 7.0E-10 | 2.8E+00  | 1.2E-03 | 3.4E+00  | 1.1E-08 | 3.0E+00  | 1.2E-11 | 4.0E+00  | 3.7E-14 |          |         |         |

**Supplementary Table 2. Candidate drugs.**

---

|    |                                                                                                                          |
|----|--------------------------------------------------------------------------------------------------------------------------|
| 1  | (3AR,6R,6AS)-6-((S)-((S)-CYCLOHEX-2-ENYL)(HYDROXY)METHYL)-6A-METHYL-4-OXO-HEXAHYDRO-2H-FURO[3,2-C]PYRROLE-6-CARBALDEHYDE |
| 2  | L-ASPARTIC ACID                                                                                                          |
| 3  | 2'-MONOPHOSPHOADENOSINE 5'-DIPHOSPHORIBOSE                                                                               |
| 4  | URIDINE-DIPHOSPHATE-N-ACETYLGLUCOSAMINE                                                                                  |
| 5  | DB04395                                                                                                                  |
| 6  | BORTEZOMIB                                                                                                               |
| 7  | CARFILZOMIB                                                                                                              |
| 8  | ANISOMYCIN                                                                                                               |
| 9  | PUROMYCIN                                                                                                                |
| 10 | L-TYROSINE                                                                                                               |
| 11 | TYROSINAL                                                                                                                |
| 12 | N6-ISOPENTENYL-ADENOSINE-5'-MONOPHOSPHATE                                                                                |
| 13 | DB08617                                                                                                                  |
| 14 | L-GLUTAMINE                                                                                                              |
| 15 | L-VALINE                                                                                                                 |
| 16 | PHOSPHONOTHREONINE                                                                                                       |
| 17 | COENZYME A                                                                                                               |
| 18 | EPOTHILONE B                                                                                                             |
| 19 | CYT997                                                                                                                   |
| 20 | 2-MERCAPTO-N-[1,2,3,10-TETRAMETHOXY-9-OXO-5,6,7,9-TETRAHYDRO-BENZO[A]HEPTALEN-7-YL]ACETAMIDE                             |
| 21 | VINCRISTINE                                                                                                              |
| 22 | VINBLASTINE                                                                                                              |
| 23 | COLCHICINE                                                                                                               |
| 24 | VINORELBINE                                                                                                              |
| 25 | GLUTATHIONE                                                                                                              |
| 26 | GLYCINE                                                                                                                  |
| 27 | L-CYSTEINE                                                                                                               |
| 28 | GAMMA-GLUTAMYL-CYSTEINE                                                                                                  |
| 29 | ADENOSINE-5'-[BETA, GAMMA-METHYLENE]TRIPHOSPHATE                                                                         |
| 30 | 3-PHOSPHOGLYCERIC ACID                                                                                                   |
| 31 | DACARBAZINE                                                                                                              |
| 32 | TETRAHYDROFOLIC ACID                                                                                                     |
| 33 | PEMETREXED                                                                                                               |
| 34 | 5--MONOPHOSPHATE-9-BETA-D-RIBOFURANOSYL XANTHINE                                                                         |
| 35 | BETA-DADP, MSA, MULTISUBSTRATE ADDUCT INHIBITOR                                                                          |
| 36 | L-GLUTAMIC ACID                                                                                                          |
| 37 | PHOSPHOGLYCOLOHYDROXAMIC ACID                                                                                            |
| 38 | [2(FORMYL-HYDROXY-AMINO)-ETHYL]-PHOSPHONIC ACID                                                                          |
| 39 | PYRIDOXAL PHOSPHATE                                                                                                      |
| 40 | CLADRIBINE                                                                                                               |
| 41 | DB03280                                                                                                                  |

---

---

|    |                                                                                                                                |
|----|--------------------------------------------------------------------------------------------------------------------------------|
| 42 | 3'-AZIDO-3'-DEOXYTHYMIDINE-5'-MONOPHOSPHATE                                                                                    |
| 43 | P1-(5'-ADENOSYL)P5-(5'-(3'AZIDO-3'-DEOXYTHYMIDYL))PENTAPHOSPHATE                                                               |
| 44 | DECITABINE                                                                                                                     |
| 45 | PROCAINAMIDE                                                                                                                   |
| 46 | 1,6-FRUCTOSE DIPHOSPHATE (LINEAR FORM)                                                                                         |
| 47 | CAPECITABINE                                                                                                                   |
| 48 | FLOXURIDINE                                                                                                                    |
| 49 | LEUCOVORIN                                                                                                                     |
| 50 | RALTITREXED                                                                                                                    |
| 51 | 6-ETHYL-5-PHENYLPYRIMIDINE-2,4-DIAMINE                                                                                         |
| 52 | N-(3,5-DIMETHOXYPHENYL)IMIDODICARBONIMIDIC DIAMIDE                                                                             |
| 53 | 10-PROPARGYL-5,8-DIDEAZAFOLIC ACID                                                                                             |
| 54 | S,S-(2-HYDROXYETHYL)THIOCYSTEINE                                                                                               |
| 55 | GEMCITABINE                                                                                                                    |
| 56 | TRIMETHOPRIM                                                                                                                   |
| 57 | TRIFLURIDINE                                                                                                                   |
| 58 | (5S)-5-(3-AMINOPROPYL)-3-(2,5-DIFLUOROPHENYL)-N-ETHYL-5-PHENYL-4,5-DIHYDRO-1H-PYRAZOLE-1-CARBOXAMIDE                           |
| 59 | (2S)-4-(2,5-DIFLUOROPHENYL)-N,N-DIMETHYL-2-PHENYL-2,5-DIHYDRO-1H-PYRROLE-1-CARBOXAMIDE                                         |
| 60 | (2S)-4-(2,5-DIFLUOROPHENYL)-N-METHYL-2-PHENYL-N-PIPERIDIN-4-YL-2,5-DIHYDRO-1H-PYRROLE-1-CARBOXAMIDE                            |
| 61 | (5R)-N,N-DIETHYL-5-METHYL-2-[(THIOPHEN-2-YLCARBONYL)AMINO]-4,5,6,7-TETRAHYDRO-1-BENZOTHIOPHENE-3-CARBOXAMIDE                   |
| 62 | MONASTROL                                                                                                                      |
| 63 | 3-[(5S)-1-ACETYL-3-(2-CHLOROPHENYL)-4,5-DIHYDRO-1H-PYRAZOL-5-YL]PHENOL                                                         |
| 64 | ADENOSINE-5-DIPHOSPHORIBOSE                                                                                                    |
| 65 | 4-(2-AMINOETHYL)BENZENESULFONYL FLUORIDE                                                                                       |
| 66 | BLEOMYCIN                                                                                                                      |
| 67 | AT9283                                                                                                                         |
| 68 | HESPERIDIN                                                                                                                     |
| 69 | 4-(4-METHYLPIPERAZIN-1-YL)-N-[5-(2-THIENYLACETYL)-1,5-DIHYDRO-PYRROLO[3,4-C]PYRAZOL-3-YL]BENZAMIDE                             |
| 70 | N-[3-(1H-BENZIMIDAZOL-2-YL)-1H-PYRAZOL-4-YL]BENZAMIDE                                                                          |
| 71 | 2-[(5,6-DIPHENYLFURO[2,3-D]PYRIMIDIN-4-YL)AMINO]ETHANOL                                                                        |
| 72 | 18-CHLORO-11,12,13,14-TETRAHYDRO-1H,10H-8,4-(AZENO)-9,15,1,3,6-BENZODIOXATRIAZACYCLOHEPTADECIN-2-ONE                           |
| 73 | 1-(5-CHLORO-2,4-DIMETHOXYPHENYL)-3-(5-CYANOPYRAZIN-2-YL)UREA                                                                   |
| 74 | (2R)-1-[(5,6-DIPHENYL-7H-PYRROLO[2,3-D]PYRIMIDIN-4-YL)AMINO]PROPAN-2-OL                                                        |
| 75 | 2-[5,6-BIS-(4-METHOXY-PHENYL)-FURO[2,3-D]PYRIMIDIN-4-YLAMINO]-ETHANOL                                                          |
| 76 | DB07243                                                                                                                        |
| 77 | REL-(9R,12S)-9,10,11,12-TETRAHYDRO-9,12-EPOXY-1H-DIINDOLO[1,2,3-FG:3',2',1'-KL]PYRROLO[3,4-I][1,6]BENZODIAZOCINE-1,3(2H)-DIONE |
| 78 | 1-[(2S)-4-(5-PHENYL-1H-PYRAZOLO[3,4-B]PYRIDIN-4-YL)MORPHOLIN-2-                                                                |

---



---

|     |                                                                                                |
|-----|------------------------------------------------------------------------------------------------|
|     | YL]METHANAMINE                                                                                 |
| 79  | N-(4-OXO-5,6,7,8-TETRAHYDRO-4H-[1,3]THIAZOLO[5,4-C]AZEPIN-2-YL)ACETAMIDE                       |
| 80  | 2-(METHYLSULFANYL)-5-(THIOPHEN-2-YLMETHYL)-1H-IMIDAZOL-4-OL                                    |
| 81  | 1-[(2S)-4-(5-BROMO-1H-PYRAZOLO[3,4-B]PYRIDIN-4-YL)MORPHOLIN-2-YL]METHANAMINE                   |
| 82  | 1-(5-CHLORO-2-METHOXYPHENYL)-3-{6-[2-(DIMETHYLAMINO)-1-METHYLETHOXY]PYRAZIN-2-YL}UREA          |
| 83  | (5-{3-[5-(PIPERIDIN-1-YLMETHYL)-1H-INDOL-2-YL]-1H-INDAZOL-6-YL}-2H-1,2,3-TRIAZOL-4-YL)METHANOL |
| 84  | 2-(CYCLOHEXYLAMINO)BENZOIC ACID                                                                |
| 85  | (2S)-1-AMINO-3-[(5-NITROQUINOLIN-8-YL)AMINO]PROPAN-2-OL                                        |
| 86  | 2,2'-{[9-(HYDROXYIMINO)-9H-FLUORENE-2,7-DIYL]BIS(OXY)}DIACETIC ACID                            |
| 87  | N-{5-[4-(4-METHYLPIPERAZIN-1-YL)PHENYL]-1H-PYRROLO[2,3-B]PYRIDIN-3-YL}NICOTINAMIDE             |
| 88  | SU9516                                                                                         |
| 89  | ALSTERPAULLONE                                                                                 |
| 90  | HYMENIALDISINE                                                                                 |
| 91  | AT7519                                                                                         |
| 92  | OLOMOUCINE                                                                                     |
| 93  | INDIRUBIN-3'-MONOXIME                                                                          |
| 94  | DOXORUBICIN                                                                                    |
| 95  | TENIPOSIDE                                                                                     |
| 96  | VALRUBICIN                                                                                     |
| 97  | IDARUBICIN                                                                                     |
| 98  | EPIRUBICIN                                                                                     |
| 99  | MITOXANTRONE                                                                                   |
| 100 | DAUNORUBICIN                                                                                   |
| 101 | AMONAFIDE                                                                                      |
| 102 | ELSAMITRUCIN                                                                                   |
| 103 | BANOXANTRONE                                                                                   |
| 104 | GENISTEIN                                                                                      |
| 105 | FINAFLOXACIN                                                                                   |
| 106 | LUCANTHONE                                                                                     |
| 107 | FLEROXACIN                                                                                     |
| 108 | SPARFLOXACIN                                                                                   |
| 109 | OFLOXACIN                                                                                      |
| 110 | LEVOFLOXACIN                                                                                   |
| 111 | NORFLOXACIN                                                                                    |
| 112 | LOMEFLOXACIN                                                                                   |
| 113 | TROVAFLOXACIN                                                                                  |
| 114 | CIPROFLOXACIN                                                                                  |
| 115 | PEFLOXACIN                                                                                     |
| 116 | ENOXACIN                                                                                       |
| 117 | DEXRAZOXANE                                                                                    |

---

---

|     |                                                                                                             |
|-----|-------------------------------------------------------------------------------------------------------------|
| 118 | AMSACRINE                                                                                                   |
| 119 | MOTEXAFIN GADOLINIUM                                                                                        |
| 120 | IMEXON                                                                                                      |
| 121 | GALLIUM NITRATE                                                                                             |
| 122 | 4-[(7-OXO-7H-THIAZOLO[5,4-E]INDOL-8-YLMETHYL)-AMINO]-N-PYRIDIN-2-YL-BENZENESULFONAMIDE                      |
| 123 | 2-ANILINO-6-CYCLOHEXYLMETHOXYPURINE                                                                         |
| 124 | (2S)-N-[(3Z)-5-CYCLOPROPYL-3H-PYRAZOL-3-YLIDENE]-2-[4-(2-OXOIMIDAZOLIDIN-1-YL)PHENYL]PROPANAMIDE            |
| 125 | 6-CYCLOHEXYLMETHOXY-2-(3'-CHLOROANILINO) PURINE                                                             |
| 126 | 5-[5,6-BIS(METHYLOXY)-1H-BENZIMIDAZOL-1-YL]-3-[[1-(2-CHLOROPHENYL)ETHYL]OXY]-2-THIOPHENECARBOXAMIDE         |
| 127 | N-[4-(2,4-DIMETHYL-THIAZOL-5-YL)-PYRIMIDIN-2-YL]-N',N'-DIMETHYL-BENZENE-1,4-DIAMINE                         |
| 128 | 1-(3,5-DICHLOROPHENYL)-5-METHYL-1H-1,2,4-TRIAZOLE-3-CARBOXYLIC ACID                                         |
| 129 | HYDROXY(OXO)(3-[[2Z)-4-[3-(1H-1,2,4-TRIAZOL-1-YLMETHYL)PHENYL]PYRIMIDIN-2(5H)-YLIDENE]AMINO}PHENYL)AMMONIUM |
| 130 | 4-METHYL-5-[(2E)-2-[(4-MORPHOLIN-4-YLPHENYL)IMINO]-2,5-DIHYDROPYRIMIDIN-4-YL]-1,3-THIAZOL-2-AMINE           |
| 131 | 4-(6-CYCLOHEXYLMETHOXY-9H-PURIN-2-YLAMINO)-BENZAMIDE                                                        |
| 132 | 3-(6-CYCLOHEXYLMETHOXY-9H-PURIN-2-YLAMINO)-BENZENESULFONAMIDE                                               |
| 133 | 3-({2-[(4-[[6-(CYCLOHEXYLMETHOXY)-9H-PURIN-2-YL]AMINO}PHENYL)SULFONYL]ETHYL}AMINO)PROPAN-1-OL               |
| 134 | 4-[[4-AMINO-6-(CYCLOHEXYLMETHOXY)-5-NITROSOPYRIMIDIN-2-YL]AMINO}BENZAMIDE                                   |
| 135 | DB06963                                                                                                     |

---

**Supplementary Table 3. Data description.**

| Data description for each evaluation and figure, software or package generating the figures, and other related details |                                                                                                                                                                                                                                                   |                                                                                                                                                          |                                                                                     |                                                                               |
|------------------------------------------------------------------------------------------------------------------------|---------------------------------------------------------------------------------------------------------------------------------------------------------------------------------------------------------------------------------------------------|----------------------------------------------------------------------------------------------------------------------------------------------------------|-------------------------------------------------------------------------------------|-------------------------------------------------------------------------------|
| Figures                                                                                                                | Datasets                                                                                                                                                                                                                                          | Softwares                                                                                                                                                | Packages                                                                            | Commands                                                                      |
| Fig 1                                                                                                                  | Three essential gene sets generated by different experimental methods (Science.350(6264):1096-101; Cell. 163(6):1515-26; Science. 350(6264):1092-6)                                                                                               | python                                                                                                                                                   | -                                                                                   | -                                                                             |
| Fig2                                                                                                                   | A<br>Expression of genes in ten groups. Expression of each gene was calculated as the mean RPKM level of 2,916 individuals from the GTEx program (Consortium 2013, <a href="http://commonfund.nih.gov/GTEx">http://commonfund.nih.gov/GTEx</a> ). | python                                                                                                                                                   | python matplotlib package (visualization)                                           | matplotlib.pyplot.violinplot()                                                |
|                                                                                                                        | B<br>Protein-protein associations were obtained from STRING database (Nucleic acids research, 2014, 43(D1): D447-D452.) (version: 10.5).                                                                                                          | python; Centiscape (Connectivity degree calculation; <a href="http://apps.cytoscape.org/apps/centiscape">http://apps.cytoscape.org/apps/centiscape</a> ) | python matplotlib package (visualization)                                           | matplotlib.pyplot.bar()                                                       |
|                                                                                                                        | C<br>Gene length was calculated based on Genecode v19 annotation ( <a href="https://www.gencodegenes.org/">https://www.gencodegenes.org/</a> )                                                                                                    | python                                                                                                                                                   | python scipy package (statistical tests); python matplotlib package (visualization) | scipy.stats.pearsonr(); matplotlib.pyplot.plot()                              |
|                                                                                                                        | D<br>Gene length and transcription count was calculated based on Genecode v19 annotation ( <a href="https://www.gencodegenes.org/">https://www.gencodegenes.org/</a> )                                                                            | python                                                                                                                                                   | python scipy package (statistical tests);python matplotlib package (visualization)  | scipy.stats.pearsonr(); matplotlib.pyplot.scatter();matplotlib.pyplot.plot(); |
|                                                                                                                        | E<br>Genomic coordinates of gene TSSs were calculated based on Genecode v19 annotation ( <a href="https://www.gencodegenes.org/">https://www.gencodegenes.org/</a> )                                                                              | python                                                                                                                                                   | python matplotlib package (visualization)                                           | matplotlib.pyplot.imshow()                                                    |

|      |               |                                                                                                                                                                                                                                                                                                                                                                                                                                    |        |                                                                                    |                                                         |
|------|---------------|------------------------------------------------------------------------------------------------------------------------------------------------------------------------------------------------------------------------------------------------------------------------------------------------------------------------------------------------------------------------------------------------------------------------------------|--------|------------------------------------------------------------------------------------|---------------------------------------------------------|
| Fig3 | F             | Genomic coordinates of gene TSSs were calculated based on Genecode v19 annotation ( <a href="https://www.gencodegenes.org/">https://www.gencodegenes.org/</a> )                                                                                                                                                                                                                                                                    | python | python scipy package (statistical tests);python matplotlib package (visualization) | scipy.stats.pearsonr();<br>matplotlib.pyplot.plot()     |
|      | G,<br>H,<br>I | Dnase-seq, Chip-seq data of H1-hESC cell line is downloaded from ENCODE ( <a href="http://hgdownload.soe.ucsc.edu/goldenPath/hg19/encodeDC/C/wgEncodeUwDnase/">http://hgdownload.soe.ucsc.edu/goldenPath/hg19/encodeDC/C/wgEncodeUwDnase/</a> ;<br><a href="http://hgdownload.soe.ucsc.edu/goldenPath/hg19/encodeDC/C/wgEncodeBroadHistone/">http://hgdownload.soe.ucsc.edu/goldenPath/hg19/encodeDC/C/wgEncodeBroadHistone/</a> ) | python | python matplotlib package (visualization)                                          | matplotlib.pyplot.plot()                                |
|      | A             | Gene age are defined by the evolutionarily most distant species group where homologs can be found. Data used: (Proceedings of the National Academy of Sciences, 2009, 106(18): 7273-7280)                                                                                                                                                                                                                                          | python | python scipy package (statistical tests);python matplotlib package (visualization) | scipy.stats.pearsonr();<br>matplotlib.pyplot.plot();    |
|      | B             | Gene age data (Proceedings of the National Academy of Sciences, 2009, 106(18): 7273-7280); Gene length was calculated based on Genecode v19 annotation ( <a href="https://www.gencodegenes.org/">https://www.gencodegenes.org/</a> )                                                                                                                                                                                               | python | python matplotlib package (visualization)                                          | matplotlib.pyplot.scatter()                             |
|      | C             | Gene age data (Proceedings of the National Academy of Sciences, 2009, 106(18): 7273-7280)                                                                                                                                                                                                                                                                                                                                          | python | python scipy package (statistical tests);python matplotlib package (visualization) | scipy.stats.fisher_exact();<br>matplotlib.pyplot.bar()  |
|      | D             | Gene age data (Proceedings of the National Academy of Sciences, 2009, 106(18): 7273-7280)                                                                                                                                                                                                                                                                                                                                          | python | python scipy package (statistical tests);python matplotlib package (visualization) | scipy.stats.ttest_ind();<br>matplotlib.pyplot.boxplot() |

|      |   |                                                                                                                                                                                                                                                                 |                                                                                                                               |                                                                                    |                                                     |
|------|---|-----------------------------------------------------------------------------------------------------------------------------------------------------------------------------------------------------------------------------------------------------------------|-------------------------------------------------------------------------------------------------------------------------------|------------------------------------------------------------------------------------|-----------------------------------------------------|
|      | E | Essential genes of various species from DEG database ( <a href="http://essentialgene.org/">http://essentialgene.org/</a> ); Protein-protein associations were obtained from STRING database (Nucleic acids research, 2014, 43(D1): D447-D452.) (version: 10.5). | Cytoscape (PPI network visualization; <a href="https://cytoscape.org/download.html">https://cytoscape.org/download.html</a> ) | -                                                                                  | -                                                   |
| Fig4 | A | Gene Expression Om-nibus (GEO) (Accession No. GSE66582)                                                                                                                                                                                                         | python                                                                                                                        | python matplotlib package (visualization)                                          | matplotlib.pyplot.plot()                            |
|      | B | Gene Expression Om-nibus (GEO) (Accession No. GSE66390)                                                                                                                                                                                                         | python                                                                                                                        | python matplotlib package (visualization)                                          | matplotlib.pyplot.plot()                            |
|      | C | Gene Expression Om-nibus (GEO) (Accession No. GSE71434)                                                                                                                                                                                                         | python                                                                                                                        | python matplotlib package (visualization)                                          | matplotlib.pyplot.plot()                            |
|      | D | Gene Expression Om-nibus (GEO) (Accession No. GSE71434) and H3K4me3 for H7es and derived cells were from ENCODE project                                                                                                                                         | python                                                                                                                        | python matplotlib package (visualization)                                          | matplotlib.pyplot.plot()                            |
|      | E | Gene Expression Om-nibus (GEO) (Accession No. GSE76505)                                                                                                                                                                                                         | python                                                                                                                        | python matplotlib package (visualization)                                          | matplotlib.pyplot.plot()                            |
|      | F | Gene Expression Om-nibus (GEO) (Accession No. GSE66582 and GSE76505)                                                                                                                                                                                            | python                                                                                                                        | python matplotlib package (visualization)                                          | matplotlib.pyplot.plot()                            |
| Fig5 | A | Cancer gene lists are from: (Nature, 2013, 502(7471): 333)(Nature, 2014, 505(7484): 495.)( Bioinformatics, 2014, 30(17): i549-i555)(science, 2013, 339(6127): 1546-1558)(Nature medicine, 2017, 23(6): 703)                                                     | python                                                                                                                        | python scipy package (statistical tests);python matplotlib package (visualization) | scipy.stats.fisher_exact(); matplotlib.pyplot.bar() |
|      | B | Gene expression datasets were downloaded from TCGA project ( <a href="https://portal.gdc.cancer.gov/">https://portal.gdc.cancer.gov/</a> )                                                                                                                      | python                                                                                                                        | python matplotlib package (visualization)                                          | matplotlib.pyplot.plot()                            |

**Supplementary Table 4. CS threshold of each gene group.**

| Gene_group | Low_threshold | High_threshold |
|------------|---------------|----------------|
| CS0        | -4.261        | -1.056         |
| CS1        | -1.056        | -0.508         |
| CS2        | -0.507        | -0.293         |
| CS3        | -0.293        | -0.167         |
| CS4        | -0.167        | -0.07          |
| CS5        | -0.07         | 0.01           |
| CS6        | 0.01          | 0.087          |
| CS7        | 0.087         | 0.172          |
| CS8        | 0.172         | 0.287          |
| CS9        | 0.287         | 1.295          |
